# Supplementary material for: Reduced penetrance of pathogenic ACMG variants in a deeply phenotyped cohort study and evaluation of ClinVar classification over time
Source: PubMed Central journal article supplement — Genet Med. 2020 Jul 15;22(11):1812–20. doi: 10.1038/s41436-020-0900-8 (PMC7605437; doi:10.1038/s41436-020-0900-8), 2020-07-15
Supplement: 41436_2020_900_MOESM1_ESM.pdf [file 41436_2020_900_MOESM1_ESM.pdf]

# Supplement 1; Results of Sanger Sequencing

A1\_RET\_chr10\_43609097\_G\_A\_exonic\_rs79781594

GCAGGGTCAGGGACAGGGGGAAGGCAGGGACCCACAGACTGTCCAGGCCCTGCTGAGGTCCCAGAAG  
TCGGCACACACAGATTTT**AGAAGCAGAGAATGGTCAGTAG**GGACACTGACAGGGAAAGTGCGGCCCTG  
AGCCAGACGAGGGACACTGCAATGTGCGGGTCAGGCCACCAGGCTCCAGTTTTGGAGGCAGAGTCCTT  
TGTTTCAGATGAAATGTTAGGAGGGGGCCTGGCTTCACCCATGGCTTCAGAAAGGCAGTGTGACCAAGC  
CCTGCCCGGCTAAGCCAAGCTGCTGGGCCCTGGCCTCACTGGGCCTATGCTTGCAGACACCAGTTGGG  
GAGGGGGCTCCTTGGGACACTGCCCTGGAAATATGGGCGCCTGGGGTGGTCAGGCGCCCAGGAGGCT  
GAGTGGGCTACGTCTGCCCTCAGGGGGCAGCATTGTTGGGGGACACGAGCCTGGGGAGCCCCGGGGGA  
TTAAAGCTGGCTATGGCACCTGCAACTGCTTCCCTGAG**GAGGAGAAGT [G/A] CTTCTGCGAG**CCCCGA  
AGACATCCAGGGTGAGTGGGTGGCGGCCGGGACCACCACCACCTCCCAGCCCCACAGAGGTCTCAACA  
GCACATCTGAGGTCCCAACAAGGGAGGAAATGCTGGGAGGCGAGTGGGCCCCATGAAACTTCCCTCC  
CTCCCTCTGGGCCCTCTGTTACTCCACCCAGGAGAGGGGCCAGGGCCCCTGTAAAGTGTCTTCTGGCCA  
TAAGTTCTATGATGGACAGGCCAGAAAAGCAGTTCTTCCACCAACAACCTTGTGAGCCTGACAAGTCA  
CTGTCCCTGTGACCATGCAGCTGGGACCCACCCAGGAACACATTTCAAGGTCAGCAGGTATGGTGGGT  
TGCACAGCCACACTGACTACACTCAGGGGTGCTGTTCTGCCTGAGCATAGGGACA**CGTTTCTGTCATT**  
**GAGTTTCT**GGTATTATATAGCCCTACGTCCCTAGCCACTTAGCATTTTTCATAAAGAAAATGCCAAAG

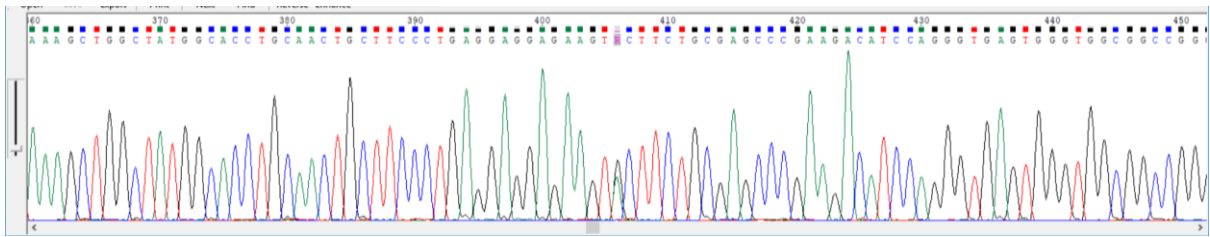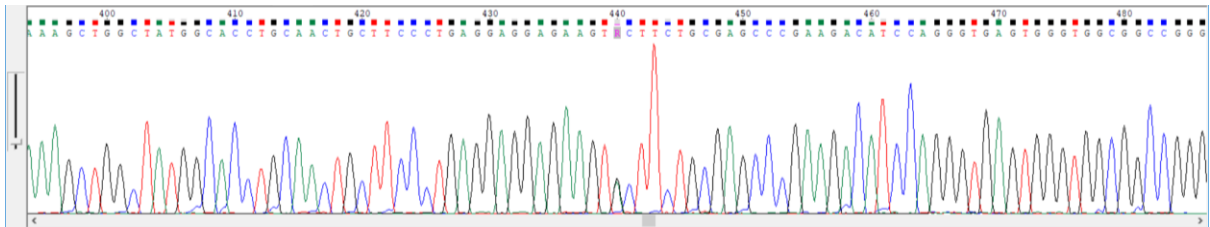

B1\_PTEN\_chr10\_89685307\_T\_A\_exonic\_rs398123317

tggATCTTTCAAATATCAAAAGTTTTTCAGTTTGATGGGAAAATGATGTCTGAATTTTCAGGGTTATTT  
TTAAGAGTACTTGATTATGACTGTCTTGTAATCTCTATGAGCTAGGTATACTTGCCTAAATGCTAA  
TGCTTTTTTAAAGAAGTTATGTCTTAA**TATTCAGTCTCATTATGTTAGGTTG**AAGATAGAAGATTATGA  
AAATATTCTCTGAAAAGCTCTGGTTTTACTTCAGATTGTATAAATCTGTGTAATGTAATAATTATTTA  
AGAATGACATGATTACTACTCTAAACCCATAGAAGGGGTATTTGTTGGATTATTTATTTTCACTTAAA  
TGGTATTTGAGATTAGGAAAAAGAAAATCTGTCTTTTGGTTTTTCTTGATAGTATTAATGTAATTTCA  
AATGTTAGCTCATTTTTGTTAATGGTGGCTTTTTGTTTGTGTTTGTGTTTAAAGGTTTTTGGATTCA  
AAGCATAAAAACCA**TTACAAGATA [T/A] ACAATCTGTA**AGTATGTTTTCTTATTTGTATGCTTGCAA  
ATATCTTCTAAAACAATTAAGTGAAAGTTATCTGCTTGTTAGAGTGAGGTAGAGTTAAAGATACA  
TTTTAACAGAATTGTATTCTAAACCGATTAAGTCAAGAAGTCCAAGAGCATTGTTAGATCATTTAGA  
AAGTGTAGTGATGAGGTA AACATTGTTGGCACAGATTCATGTTACTTGATCTGCTTTAAATGACTTG  
GCATCTAGCCCATATTTGAGCCATAACCGTGTGGTAATTTGAAGTGAATTCACAGTAGAGCTTCTG  
TTAAAGCACTAATAGCATCTTCCATGGAGGTATACTTCAGAGTGAATATAATTTTGTTTATCCTGTGT  
CTCTAGAGCTATTGACTGAAAAGCTGTTAGGGCATTCTCTAAGTGTACATCACCTAAGTTATTTAAA  
ATTGCTGAATTAGGTGGCTTGTCTTGTCTAGGACAGAGTTTAAAG**GCCCACCTGATTGATA**

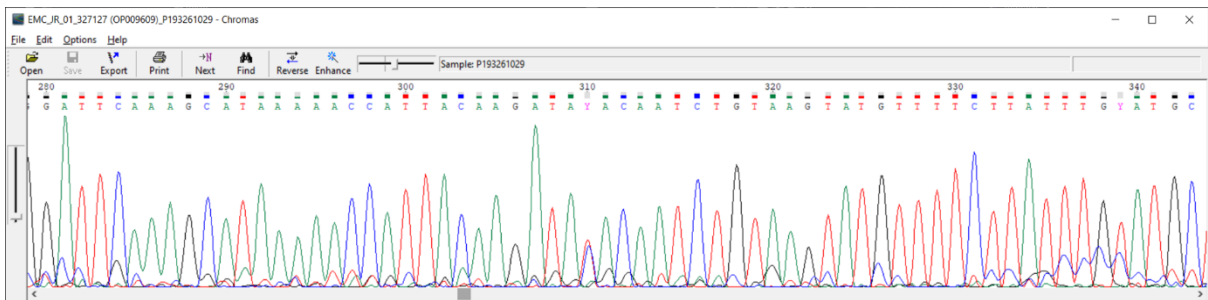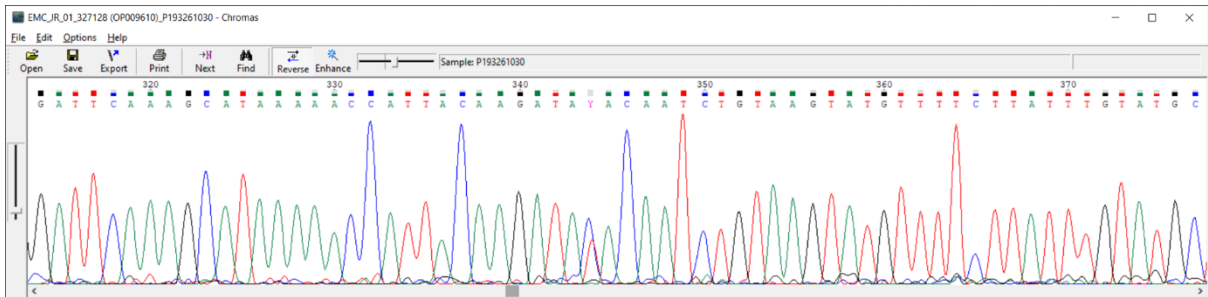

C1\_KCNQ1\_chr11\_2591882\_G\_A\_exonic\_rs179489

GGGTTCTGGCGTGGGACCCCTCTGACCCAGGCTAGGGTTCTGGCGTGGGACGCCCTCTGGCCCAA  
GCTGGGGTTCTGGTGTGGGGCCCCCTCTGACCCAAGCTGGGGTTCTGGCGTCGGACGCCCTCTGGC  
CCAAGCTGGAGTTCCTGGTGTGGGGCCCCCTCTGACCCAAGCTGGGGTTCTGGCGTCGGACGCCCTC  
TGGCCAAGCTGGGGTTCTGGTGTGGGGCCCCCTCTGGCCAAGGCTGGGGTTCTGGTGTGGGGCCT  
CCTCTGGCCTGGGTGGGCCTGGCCTGAGAGCTGCAGCCTCACCTGGGCTCCACTGCCTATGGACATGA  
GCTGAAGCTGCTCAGCCTTCCAGGGCCTCTGTGCG **CAGGCATCACCATCCG** CAGCAGGCCAGGACCCG  
GGCTGCTGTTCTCAGGGTGTCTTCAGCGGAGGCTCCAGCATGGCTGGGTTCAAACAGGTTGCAGGG  
TCTGAAGCCACTCAAGGCCGAGCCTGCCTGCAGTGAGCGTCCCACTCTGTCCCTGCAGGAGATCGTGC  
TGGT **GGTGTCTTC [G/A] GGACGGAGTA** CGTGGTCCGCCTCTGGTCCGCCGGCTGCCGAGCAAGTA  
CGTGGGCCTCTGGGGG [G/A] GCTGCGCTTTGCCCGGAAGCCATTTCCATCATCGGTGAGTCATGC  
CTGCCCTGTGGAGTACGCCCAGGTTTCCAGACCAGGAAGGACCCCCACCTCATGACCCTACCAGA  
TGGAGTCCCCTAAGGACTGGGAACCCCAAGGCCAGCAGGGGGTGACTGCCAGGACCCAGCACAGGA  
GCATTGGCAGCCCTCAGCAGCCTCTGCACTCAGACGCTGATCATGGTGTGGGGGTAGGGGGTTGGTC  
CCTCA **CAGATTCCCATGAGCCTC** ACAGCCAGCATAGCTTCATGGTGGGCCAGTCACCCCTCGGCAGCC  
TGAGAACCATGGTCCAGGCCTGAGGCCCTGCCTTTCTGGCCACTTGCAGGGCTCAGCACAGGGCCCA  
GCCTAGGCCGGGGGCTCCACATGGCCAGGACAGAGGTTGGGTCTCTCCGTTTAGATGCTGCCTGCCTC

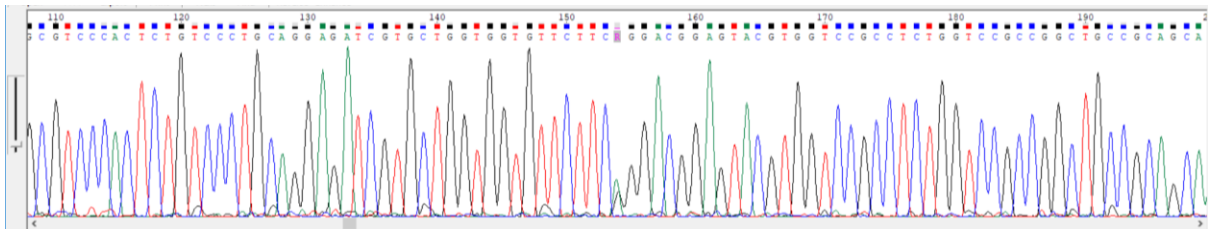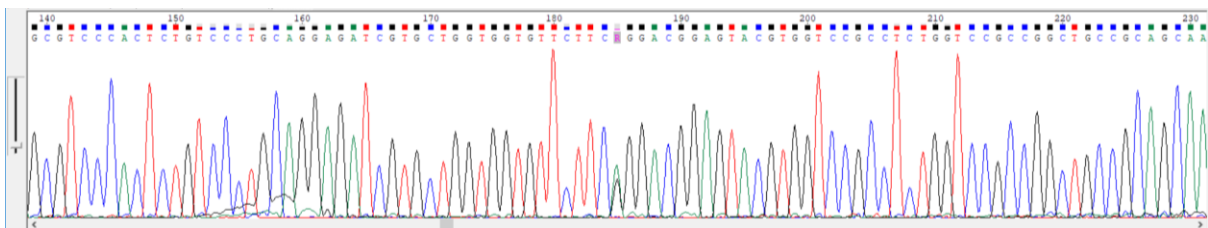

D1\_KCNQ1\_chr11\_2591949\_G\_A\_exonic\_rs120074178

TGGCCAAGCTGGGGTTCCTGGTGTGGGGCCCCCTCTGGCCAAGGCTGGGGTTCCTGGTGTGGGGCCT  
CCTCTGGCCTGGGTGGGCCTGGCCTGAGAGCTGCAGCCTCACCTGGGCTCCACTGCCTATGGACATGA  
GCTGAAGCTGCTCAGCCTTCCAGGGCCTCTGTGCG **CAGGCATCACCATCCG** CAGCAGGCCAGGACCCG  
GGCCTGCTGTTCTCAGGGTGTCTTCAGCGGAGGCTCCAGCATGGCTGGGTTCAAACAGGTTGCAGGG  
TCTGAAGCCACTCAAGGCCGAGCCTGCCTGCAGTGAGCGTCCCACTCTGTCCCTGCAGGAGATCGTGC  
TGGTGGTGTTCCTTC [G/A] GGACGGAGTACGTGGTCCGCTCTGGTCCGCCGGCTGCCGCAGCAAGTA  
CGTGGGC **CTCTGGGGGC [G/A] GCTGCGCTTT** GCCCGGAAGCCATTTCCATCATCGGTGAGTCATGC  
CTGCCCTGTGGAGGTCACGCCCAGGTTTCCAGACCAGGAAGGACCCCCACCTCATGACCCCTACCAGA  
TGGAGTCCCCTAAGGACTGGGGAACCCCAAGGCCAGCAGGGGGTGACTGCCCAGGACCCAGCACAGGA  
GCATTGGCAGCCCTCAGCAGCCTCTGCACTCAGACGCTGATCATGGTGTGGGGGTAGGGGGTTGGTC  
CCTCA **CAGATTCCCATGAGCCTC** ACAGCCCAGCATAGCTTCATGGTGGGCCAGTCACCCCTCGGCAGCC  
TGAGAACCATGGTCCAGGCCTGAGGCCCTGCCCTTCTGGCCACTTGACAGGGCTCAGCACAGGGCCCA  
GCCTAGGCCGGGGCTCCACATGGCCAGGACAGAGGTTGGGTCTCTCCGTTTAGATGCTGCCTGCCTC  
CCTATCCGAGGTGTCTCCATGTCCCCGGTCATCAGGGCGTGACCCGTCTGACCAGCAAGCCCCTTCCC

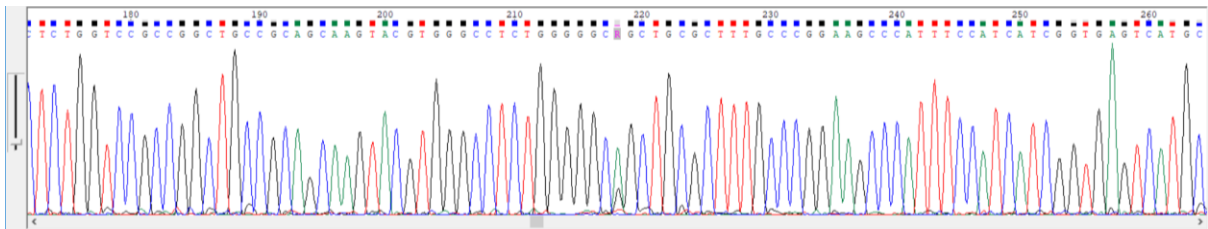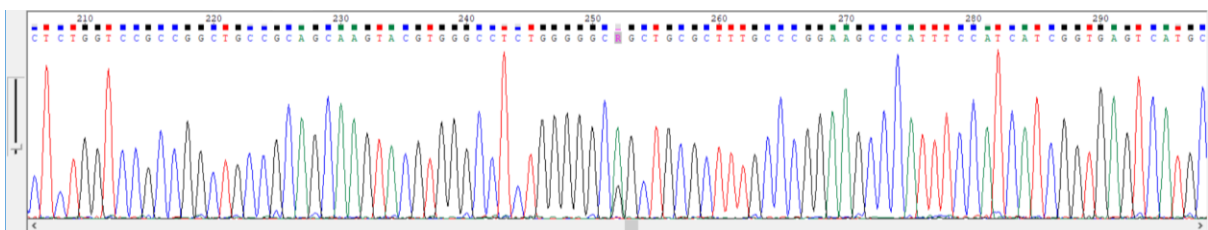

E1\_MYBPC3\_chr11\_47356671\_G\_A\_exonic\_rs387907267

gtgtgatctcagctcattgcaactgccacctcccgggtccaagcgattcttctgcctcagcctcccaa  
gtagttgagggactacaggcacgcgccaccacactggctagtttttgatttttagtagagacaggg  
tttactatggtggccaggctggtctcaaactcctgacctcaagtgatctgctgacctggcctccta  
aagtgtgggattacaggcttgagccactgtgctggccACCCTCTCTGCACTTTTTCCCTAG **GCCTA**  
**GCGCATGGACG**ATGGCTCCAACCCCTCCTGTCTCTGCCAGCGTTCTGGGCAGAGCATTCTGGGCCTC  
CCCAACTGTCCCCACCTCCACTGGACACCAAGGGCCTGGGGTGTCAATGGCGGTCTTGTGACTGCAC  
AAAGGGGCACTCACGCAGGATCTCCTGCACTGTCACCGGCTCCGTGGTGGTAACAGGGGCTCCAGGCC  
CTGCCATATTGTGT **GCCCCACTC [G/A] GAAAAGCAGC**CGGGCCCCGTGGGCAGGTCCCTCACCAG  
TATCGATGTGTGCTCTGTGACCCCTGCAGGGCAGCCACCCACTCTGAGCCTGGGGGTGGGGAGGGGG  
AGGCAAGGCCACAGGCTGTGTCACCACTGACACCCCACTCCCCTGCCCCTCCTCTGATAGGAATCT  
CCAGGATTTAAATATGTTTTTTTAAATTTTTATTGTTTATTATTTTTGAGATGGA **gtttcgtctctt**  
**gtctccca**ggctggagtgcaatggcatgatcttggtcaccgcaacttctgctcaccgagttcaagtg  
attctcctgctcagcctcccgcgtagctgggatcacaggtgccaccaccacacccggctaattttg  
tatttttagtagagacggggtttctccacgttggtcagactggtctcgaactcccgacctcaggtgat  
ccgccaccttggcctcccaaagtgtggtgggattacaggcgtaagccatcgcgc

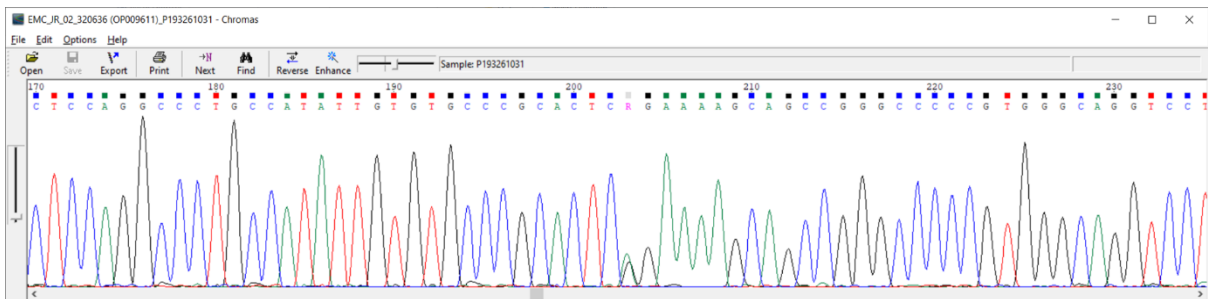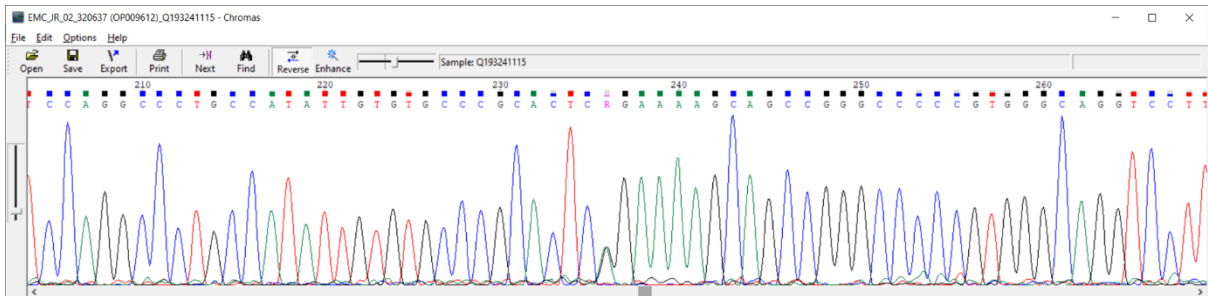

F1\_MYL2\_chr12\_111348980\_C\_G\_splicing\_rs199474813

GGCTTTGGTCATCCAGGTAACATTCCAGGAAAACGTGATCCTTGATAGAAACAGTTCTGAGTGGCTGC  
AAAGGTCTACCTTAAATAAAGAGTCACCAAGATTCAATAATAATGACTGCAAGGCTGTCACTAGCTCA  
TCTGCCTTTGCCTTCCTTACACAAGGCACTGTTTGTGAGAGAAATGTCGTGACCAAATACACGACCTC  
CTGTTTATTGGAACATGGCCTCTGGATGGATTTCCAAGTGTAGGATGTGCGGCCACGAAGTACCCATA  
GCCACCCAGGCTGCAAAGAAGATGGAGGTGGATAAATGGGGCAGCCACATGGCTAACAGACAAGGTAG  
GGACAGAGGCGGTACTCGGGGAGAGAGATGAGGGCAGGGACCCTCTGCAAAGACGAGCCAGGGCG  
CAGCAGCGAGCCCCCTCTAGTCTTCTCTTCTCCGTGGGTGATGATGTGCACCAGGTCTTGTAGTC  
CAAGTTGCCAGTCACGTCAGGGGGGAAGGCGGCGAACA TCTGGTCAAC [C/G] TGCAATGAGC CAGCA  
ACACGTGCTAAGGACGAGGGGAGGGGAAGTGGAGACGGAGGGTGGGGGGCTGTGGGCGGGGCCTGAGTG  
GACGGATAGCTGGGGGGTGGGGGATGGGAACATGGGCCACTCAGAGGGTCTCCGGGGAaggacttcc  
ccagctgctgcaggggccccctcgcccaaggtcatgccccttctggggcagcccacagccagcggatg  
gattgggtgtgggggtataaaggcacggccatctcgcccaacttggtaaccttcaggagagctgtagaa  
taagtcacctccctgggtagtcagcagtgccgatcttgggctaaatcttggctcaacttcttccct  
catgcacttttcttcttcttgccttccctGTTCTTCCTTTCTTGCCCTTCCCTGTTCTTCCTTCCCTG  
ACCCAAGGGCCCTCCAAGTAAACATCATGCAGAGATGTCCCTGGAAACCCAGCCTTCCACTgggat  
cacaactcaagggttccgagggggccaggcaggttatgcaagggagcaggataggtcctatggctaaa

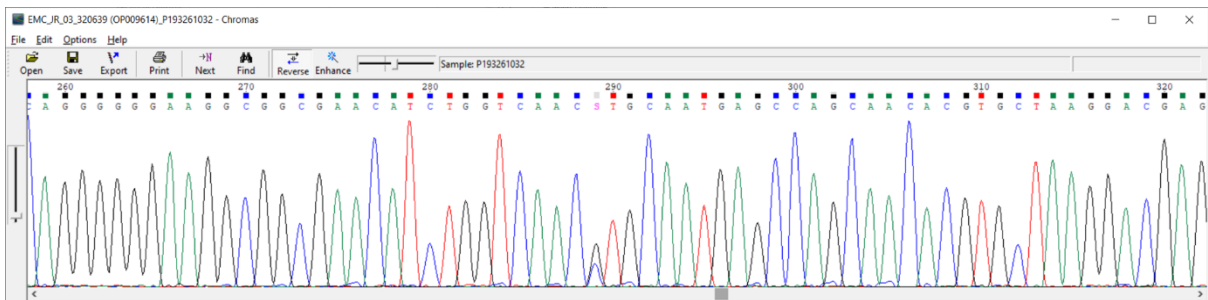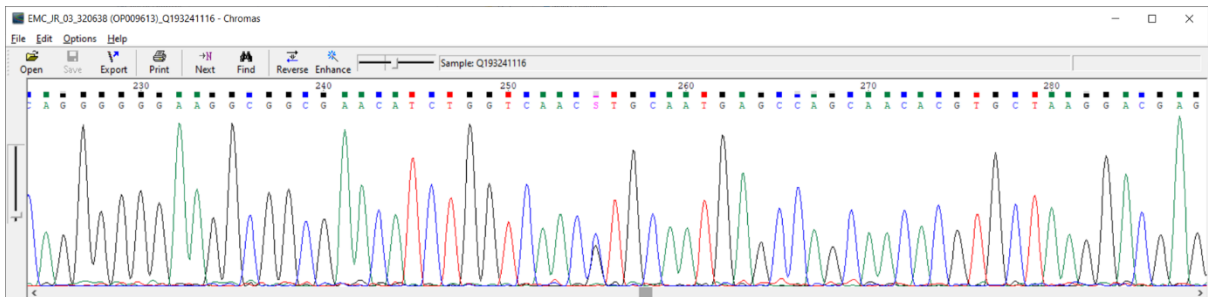

F2\_MYL2\_chr12\_111348980\_C\_G\_splicing\_rs199474813

GGCTTTGGTCATCCAGGTAACATTCCAGGAAAACGTGATCCTTGATAGAAACAGTTCTGAGTGGCTGC  
AAAGGTCTACCTTAAATAAAGAGTCACCAAGATTCAATAATAATGACTGCAAGGCTGTCACTAGCTCA  
TCTGCCTTTGCCTTCCTTACACAAGGCACTGTTTGTGAGAGAAATGTCGTGACCAAATACACGACCTC  
CTGTTTATTGGAACATGGCCTCTGGATGGATTT**CCA**ACTGTAGGATGT**GCGG**CCACGAAGTACCCATA  
GCCACCCAGGCTGCAAAGAAGATGGAGGTGGATAAAATGGGGCAGCCACATGGCTAACAGACAAGGTAG  
GGACAGAGGGCGGTACTCGGGGAGAGAGATGAGGGCAGGGACCACTCTGCAAAGACGAGCCAGGGCG  
CAGCAGCGAGCCCCCTCTAGTCCTTCTCTCTCCGTGGGTGATGATGTGCACCAGGTCTTGTAGTC  
CAAGTTGCCAGTCACGTCAGGGGGGAAGGCGGCGAACA**TCTGGTCAAC [C/G] TGCAATGAGC**CAGCA  
ACACGTGCTAAGGACGAGGGGAGGGAACTGAGACGGAGGGTGGGGGGCTGTGGGCGGGGCCTGAGTG  
GACGGATAGCTGGGGGGTGGGGGATGGGAACATGGGCCACTCAGAGGGTCTCCGGGGAaggacttcc  
ccagctgctgcaggggccccctcgcccaaggtcatgccccttctggggcagccacagccagcggatg**g**  
**gattggtgtgggggtata**aaggcacggccatctcgcccaacttggtaaccttcaggagagctgtagaa  
taagtcacctccctgggtagtcagcagtgccgatcttgggctaaatcttggctcaacttcttccct  
catgcacttttcttcccttgccttccctGTTCTTCCTTTCTTGCCCTTCCCTGTTCTTCCTTCCCTG  
ACCCAAGGGCCCTCCAAGTAAACATCATGCAGAGATGTCCCTGGAAACCCAGCCTTCCACTgggat  
cacaactcaagggttccgagggggccaggcaggttatgcaagggagcaggataggtcctatggctaaa

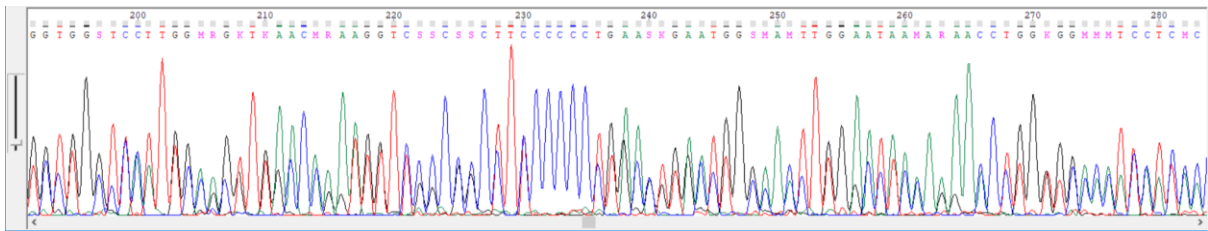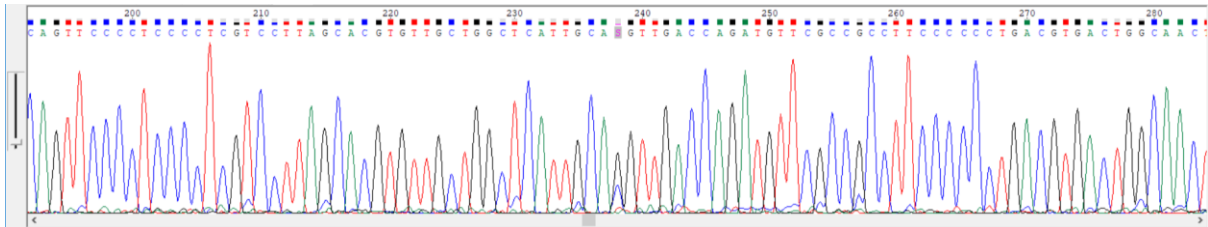

F3\_MYL2\_chr12\_111348980\_C\_G\_splicing\_rs199474813

GGCTTTGGTCATCCAGGTAACATTCCAGGAAAACGTGATCCTTGATAGAAACAGTTCTGAGTGGCTGC  
AAAGGTCTACCTTAAATAAAGAGTCACCAAGATTCAATAATAATGACTGCAAGGCTGTCACTAGCTCA  
TCTGCCTTTGCCTTCCTTACACAAGGCACTGTTTGTGAGAGAAATGTCGTGACCAAATACACGACCTC  
CTGTTTATTGGAACATGGCCTCTGGATGGATTT**CCA**ACTGTAGGATGT**GCGG**CCACGAAGTACCCATA  
GCCACCCAGGCTGCAAAGAAGATGGAGGTGGATAAATGGGGCAGCCACATGGCTAACAGACAAGGTAG  
GGACAGAGGGCGGTACTCGGGGAGAGAGATGAGGGCAGGGACCACTCTGCAAAGACGAGCCAGGGCG  
CAGCAGCGAGCCCCCTCTAGTCCTTCTCTCTCCGTGGGTGATGATGTGCACCAGGTCTTGTAGTC  
CAAGTTGCCAGTCACGTCAGGGGGGAAGGCGGCGAACA**TCTGGTCAAC [C/G] TGCAATGAGC**CAGCA  
ACACGTGCTAAGGACGAGGGGAGGGGAAGTGGAGACGGAGGGTGGGGGGCTGTGGGCGGGGCCTGAGTG  
GACGGATAGCTGGGGGGTGGGGGATGGGAACATGGGCCACTCAGAGGGTCTCCGGGGAAGgacttcc  
ccagctgctgcaggggccccctcgcccaaggtcatgccccttctggggcagccacagccagcggatg**g**  
**gattgggtgtgggggtata**aaggcacggccatctcgcccaacttggtaaccttcaggagagctgtagaa  
taagtcacctccctgggtagtcagcagtgccgatcttgggctaaatcttggctcaacttcttccct  
catgcacttttcttcccttgccttccctGTTCTTCCTTTCTTGCCCTTCCCTGTTCTTCCTTCCCTG  
ACCCAAGGGCCCTCCAAGTAAACATCATGCAGAGATGTCCCTGGAAACCCAGCCTTCCACTgggat  
cacaactcaagggttccgagggggccaggcaggttatgcaagggagcaggataggtcctatggctaaa

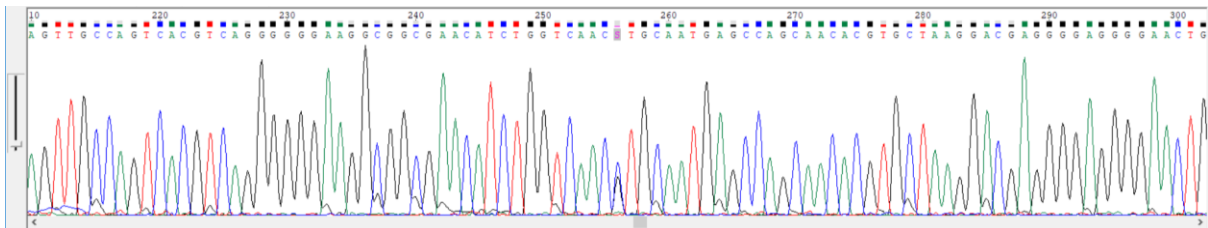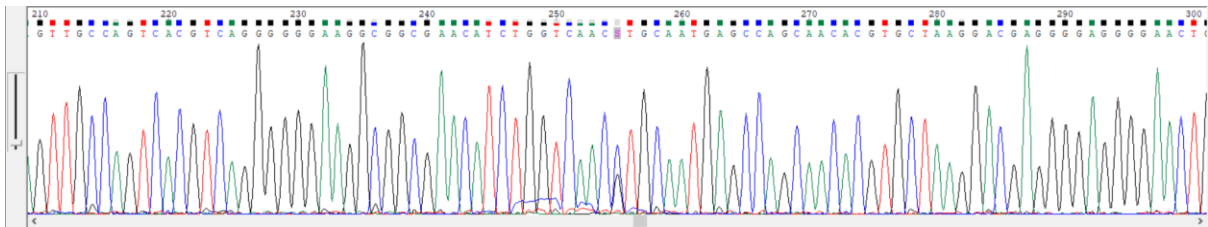



F4\_MYL2\_chr12\_111348980\_C\_G\_splicing\_rs199474813

GGCTTTGGTCATCCAGGTAACATTCCAGGAAAACGTGATCCTTGATAGAAACAGTTCTGAGTGGCTGC  
AAAGGTCTACCTTAAATAAAGAGTCACCAAGATTCAATAATAATGACTGCAAGGCTGTCACTAGCTCA  
TCTGCCTTTGCCTTCCTTACACAAGGCACTGTTTGTGAGAGAAATGTCGTGACCAAATACACGACCTC  
CTGTTTATTGGAACATGGCCTCTGGATGGATTT**CCA**ACTGTAGGATGT**GCGG**CCACGAAGTACCCATA  
GCCACCCAGGCTGCAAAGAAGATGGAGGTGGATAAATGGGGCAGCCACATGGCTAACAGACAAGGTAG  
GGACAGAGGGCGGTACTCGGGGAGAGAGATGAGGGCAGGGACCACTCTGCAAAGACGAGCCAGGGCG  
CAGCAGCGAGCCCCCTCTAGTCCTTCTCTTCTCCGTGGGTGATGATGTGCACCAGGTTCTTGTAGTC  
CAAGTTGCCAGTCACGTCAGGGGGGAAGGCGGCGAACA**TCTGGTCAAC [C/G] TGCAATGAGC**CAGCA  
ACACGTGCTAAGGACGAGGGGAGGGGAAGTGGAGACGGAGGGTGGGGGGCTGTGGGCGGGGCCTGAGTG  
GACGGATAGCTGGGGGGTGGGGGATGGGAACATGGGCCACTCAGAGGGTCTCCGGGGAAGgacttcc  
ccagctgctgcaggggccccctcgcccaaggtcatgccccttctggggcagcccacagccagcggatg**g**  
**gattgggtgtgggggtata**aaggcacggccatctcgcccaacttggtagctctcaggagagctgtagaa  
taagctccctccctgggtagtcagcagtgccgatcttgggctaaatcttggctcaacttcttccct  
catgacttttcccttcccttgccttccctGTTCTTCCTTTCTTGCCCTTCCCTGTTCTTCCTTCCCTG  
ACCCAAGGGCCCTCCAAGTAAACATCATGCAGAGATGTCCCTGGAAACCCAGCCTTCCACTgggat  
cacaactcaagggttccgagggggccaggcaggttatgcaaggagcaggataggtcctatggctaaa

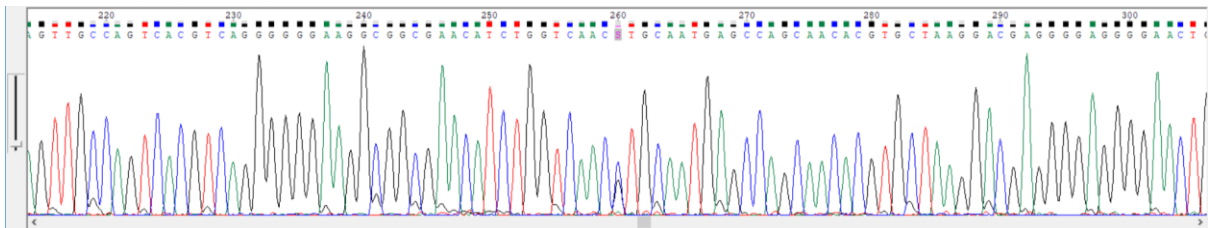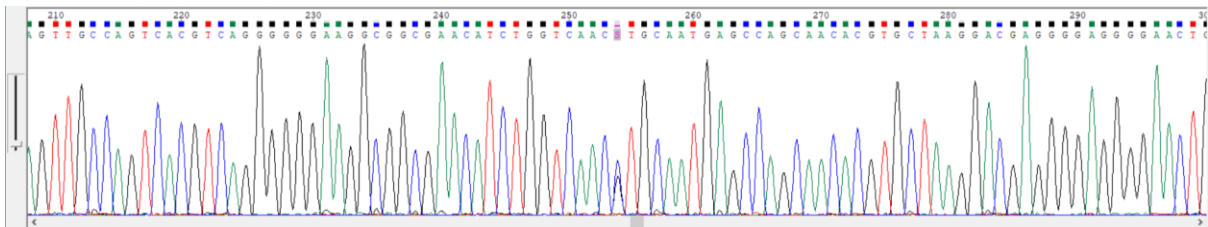

F5\_MYL2\_chr12\_111348980\_C\_G\_splicing\_rs199474813

GGCTTTGGTCATCCAGGTAACATTCCAGGAAAACGTGATCCTTGATAGAAACAGTTCTGAGTGGCTGC  
AAAGGTCTACCTTAAATAAAGAGTCACCAAGATTCAATAATAATGACTGCAAGGCTGTCACTAGCTCA  
TCTGCCTTTGCCTTCTTACACAAGGCACTGTTTGTGAGAGAAATGTCGTGACCAAATACACGACCTC  
CTGTTTATTGGAACATGGCCTCTGGATGGATTT**CCA**ACTGTAGGATGT**GCGG**CCACGAAGTACCCATA  
GCCACCCAGGCTGCAAAGAAGATGGAGGTGGATAAATGGGGCAGCCACATGGCTAACAGACAAGGTAG  
GGACAGAGGGCGGTACTCGGGGAGAGAGATGAGGGCAGGGACCACTCTGCAAAGACGAGCCAGGGCG  
CAGCAGCGAGCCCCCTCTAGTCTTCTCTTCTCCGTGGGTGATGATGTGCACCAGGTTCTTGTAGTC  
CAAGTTGCCAGTCACGTCAGGGGGGAAGGCGGCGAACA**TCTGGTCAAC [C/G] TGCAATGAGC**CAGCA  
ACACGTGCTAAGGACGAGGGGAGGGGAAGTGGAGACGGAGGGTGGGGGGCTGTGGGCGGGGCCTGAGTG  
GACGGATAGCTGGGGGGTGGGGGATGGGAACATGGGCCACTCAGAGGGTCTCCGGGGAAGgacttcc  
ccagctgctgcaggggccccctcgcccaaggtcatgccccttctggggcagcccacagccagcggatg**g**  
**gattgggtgtgggggtata**aaggcacggccatctcgcccaacttggtagctctcaggagagctgtagaa  
taagctccctccctgggtagtcagcagtgccgatcttgggctaaatcttggctcaacttcttccct  
catgacttttcttcccttgccttccctGTTCTTCTTTCTTGCCCTTCCCTGTTCTTCTTCCCTG  
ACCCAAGGGCCCTCCAAGTAAACATCATGCAGAGATGTCCCTGGAAACCCAGCCTTCCACTgggat  
cacaactcaagggttccgagggggccaggcaggttatgcaagggagcaggataggtcctatggctaaa

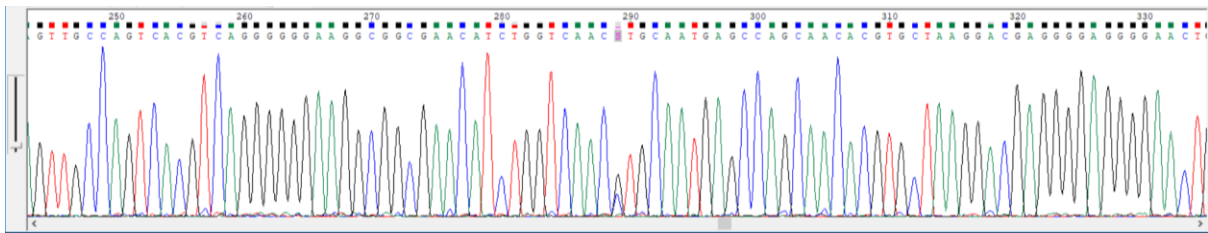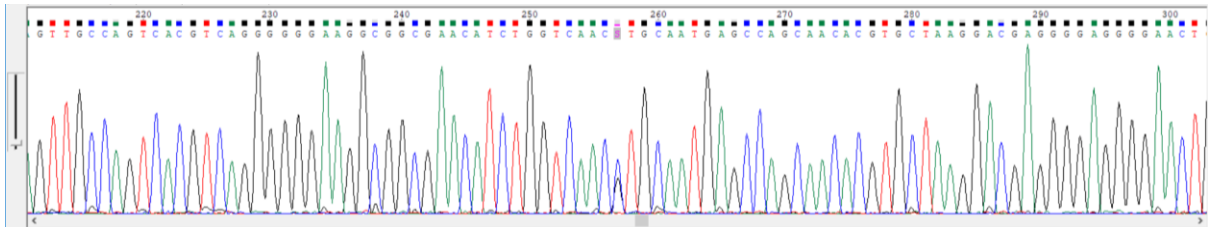

F6\_MYL2\_chr12\_111348980\_C\_G\_splicing\_rs199474813

GGCTTTGGTCATCCAGGTAACATTCCAGGAAAACGTGATCCTTGATAGAAACAGTTCTGAGTGGCTGC  
AAAGGTCTACCTTAAATAAAGAGTCACCAAGATTCAATAATAATGACTGCAAGGCTGTCACTAGCTCA  
TCTGCCTTTGCCTTCCTTACACAAGGCACTGTTTGTGAGAGAAATGTCGTGACCAAATACACGACCTC  
CTGTTTATTGGAACATGGCCTCTGGATGGATTT**CCA**ACTGTAGGATGT**GCGG**CCACGAAGTACCCATA  
GCCACCCAGGCTGCAAAGAAGATGGAGGTGGATAAATGGGGCAGCCACATGGCTAACAGACAAGGTAG  
GGACAGAGGGCGGTACTCGGGGAGAGAGATGAGGGCAGGGACCACTCTGCAAAGACGAGCCAGGGCG  
CAGCAGCGAGCCCCCTCTAGTCCTTCTCTTCTCCGTGGGTGATGATGTGCACCAGGTTCTTGTAGTC  
CAAGTTGCCAGTCACGTCAGGGGGGAAGGCGGCGAACA**TCTGGTCAAC [C/G] TGCAATGAGC**CAGCA  
ACACGTGCTAAGGACGAGGGGAGGGGAAGTGGAGACGGAGGGTGGGGGGCTGTGGGCGGGGCCTGAGTG  
GACGGATAGCTGGGGGGTGGGGGATGGGAACATGGGCCACTCAGAGGGTCTCCGGGGAAGgacttcc  
ccagctgctgcaggggccccctcgcccaaggtcatgccccttctggggcagcccacagccagcggatg**g**  
**gattggtgtgggggtata**aaggcacggccatctcgcccacttggtagctctcaggagagctgtagaa  
taagtcacctccctgggtagtcagcagtgccgatcttgggctaaatcttggctcaacttcttccct  
catgacttttcttcccttgccttccctGTTCTTCCTTTCTTGCCCTTCCCTGTTCTTCCTTCCCTG  
ACCCAAGGGCCCTCCAAGTAAACATCATGCAGAGATGTCCCTGGAAACCCAGCCTTCCACTgggat  
cacaactcaagggttccgagggggccaggcaggttatgcaaggagcaggataggtcctatggctaaa

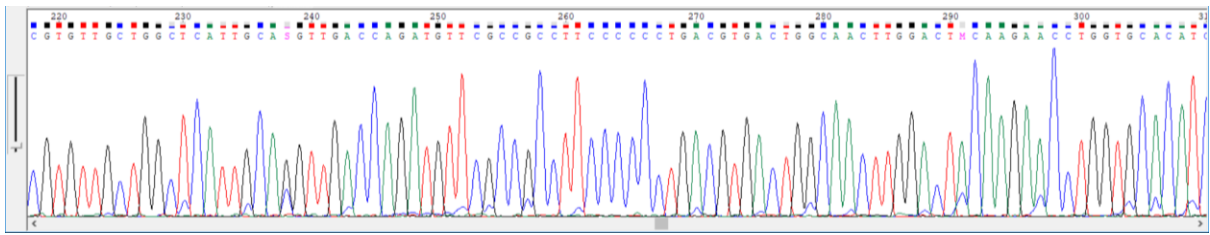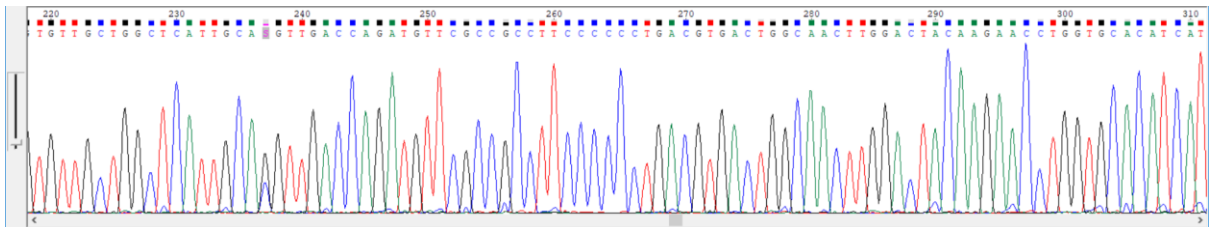

F7\_MYL2\_chr12\_111348980\_C\_G\_splicing\_rs199474813

GGCTTTGGTCATCCAGGTAACATTCCAGGAAAACGTGATCCTTGATAGAAACAGTTCTGAGTGGCTGC  
AAAGGTCTACCTTAAATAAAGAGTCACCAAGATTCAATAATAATGACTGCAAGGCTGTCACTAGCTCA  
TCTGCCTTTGCCTTCTTACACAAGGCACTGTTTGTGTCAGAGAAATGTCGTGACCAAATACACGACCTC  
CTGTTTATTGGAACATGGCCTCTGGATGGATTT**CCA**ACTGTAGGATGT**GCGG**CCACGAAGTACCCATA  
GCCACCCAGGCTGCAAAGAAGATGGAGGTGGATAAATGGGGCAGCCACATGGCTAACAGACAAGGTAG  
GGACAGAGGGCGGTACTCGGGGAGAGAGATGAGGGCAGGGACCACTCTGCAAAGACGAGCCAGGGCG  
CAGCAGCGAGCCCCCTCTAGTCCTTCTCTTCTCCGTGGGTGATGATGTGCACCAGGTTCTTGTAGTC  
CAAGTTGCCAGTCACGTCAGGGGGGAAGGCGGCGAACA**TCTGGTCAAC [C/G] TGCAATGAGC**CAGCA  
ACACGTGCTAAGGACGAGGGGAGGGGAAGTGAAGACGGAGGGTGGGGGGCTGTGGGCGGGGCCTGAGTG  
GACGGATAGCTGGGGGGTGGGGGATGGGAACATGGGCCACTCAGAGGGTCTCCGGGGAaggacttcc  
ccagctgctgcaggggccccctcgcccaaggtcatgccccttctggggcagcccacagccagcggatg**g**  
**gattgggtgtgggggtata**aaggcacggccatctcgcccaacttggtagctctcaggagagctgtagaa  
taagtcacctccctgggtagtcagcagtgccgatcttgggctaaatcttggctcaacttcttccct  
catgacttttcttcccttgccttccctGTTCTTCCTTTCTTGCCCTTCCCTGTTCTTCCTTCCCTG  
ACCCAAGGGCCCTCCAAGTAAACATCATGCAGAGATGTCCCTGGAAACCCAGCCTTCCACTgggat  
cacaactcaagggttccgagggggccaggcaggttatgcaaggagcaggataggtcctatggctaaa

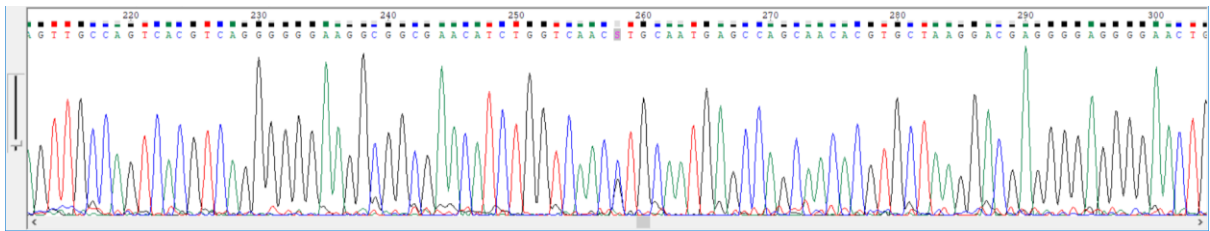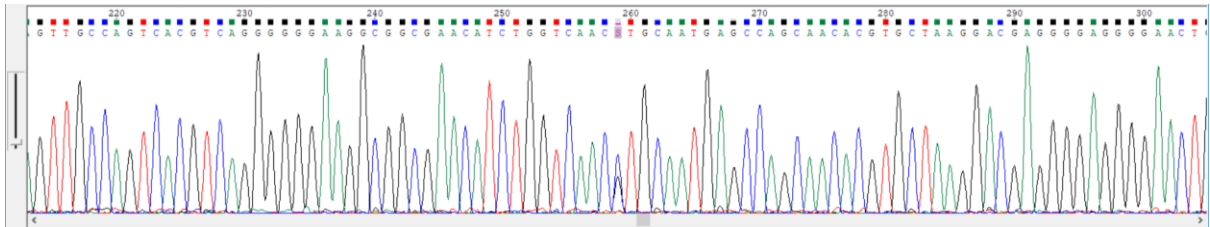

G1\_MYL2\_chr12\_111356937\_C\_T\_exonic\_rs104894368

accagcagttctgcttttaggaatt**tacccccaagaaataaccag**agatacaagcaaagaggtggtta  
ttatagtagtaaaacattataaacaatgtcatatttaacataggaaatgggttaaatacatgata  
gGAAATGTTAATGGTGAATTTCTCAACGAAAAAATGCAGGTGTAATCAGTGGGCACAGAAGATTATA  
ATTTTGTTTAataaatatatacatagataacaaaatggtttgaagggtatataactaaaatgtgaact  
gattatctctgggtaatagaattgtaggtagtttttatttccttttctgtgctttttctgaaaat  
ccaacatttttcaacatggaatagttttactttgataatcagtgaaaaTATTAATAATAGTTTCTTT  
TAAAAATTCACACATCCGTTTCAAGCCGAATTTGGGATTGTTTGGAGGATAGAGGCATCTAATGAAAGG  
TCCCTGCTGGGAATATGGAACAAAAAGAAGGTTCTCCCTCGTGGGTGGGATTTCCATCCAGCGGATG  
ATTCAATAGCTGCACCCACCTCCTTAAATTCCTGGATT**TGGGTCTGTT [C/T] GAACATGGAG**AACAC  
GTTGGAGTTGGCGCCCCGGCTCTCTTCTTTGCTTTCTTAGGTGCCTGGGGGAAAAAGCATCGATTA  
AAAGAGTGAGAGGCTGGGAGTCAAAAACTAGGTCAAGCCCTACTCTGGGTGTGTTTCATCTCTGTTG  
CAGGGCTCAGCTGCCATCTGTGAAATGTGGGTACAGCATCCACACTCAGGTCTCCA**AACGGTGATGC**  
**TGGAGGG**AGCAAAGGACATGACATGAAGTTTCTCCAGAGCCCTCTGGTACCAGTGGATCATAAGCGTT  
TGTGCATCTTGCAGTGGCTCCTTACCAACTAGGAGAAGCCACAGGTGTGTCCCTGGGGATGGAGGCC  
ACACCTTCAGATCGCCCTGCAGGATCCAGCCACTTTTGTCTGATGCATTTACAAAAAGCTCAGTA  
ATGCACAGAAGGAGAATTGATTGGAGGGAAAGAAAAAGTCAGGCTCACTAAGCCATGATGAATGCCAA  
GATGAAATGACAGTTCTTCAAGGTGTTAAACCCAACTGCGCCCCACACCCACAAATTTCCCTTGCT

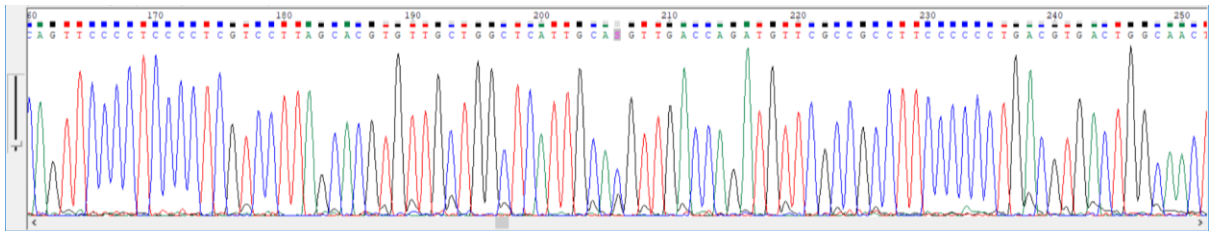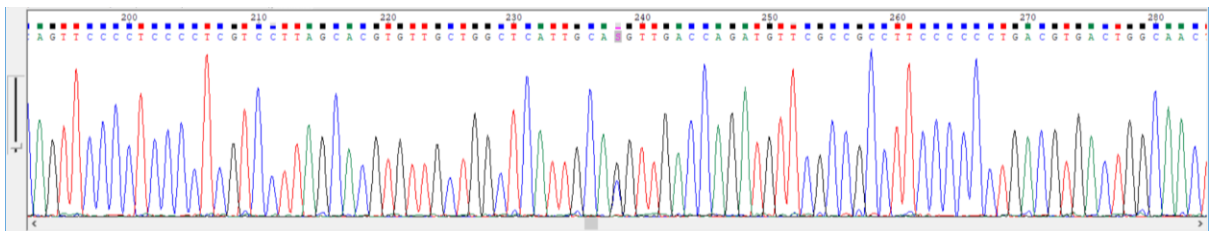

H1\_BRCA2\_chr13\_32900281\_AA\_-\_exonic\_rs397507739

cattctcctgcctcagcctcccaagtagctgggactacaggcgcccgccaccatgcccggctaatttt  
ttgtatTTTTtagtagagacggggtttcaccgtgtagctaggatggtctcgatttctgacctcgtga  
tccgcccgcctcagcctcccagactgctgggattacaggcgtgaaccactgtgccccggccTACTTTAC  
AAAATTTTTGGAGTTAAAATACACGGTTTCCAGCAGCTGAAATTTGTGAGTACATATGTGTTGGCATT  
TTAAACATCACTTGATGATTATTTAATGCTTCATGAGAGATTTACTTTTTTAAAATGTAATATAAAAATA  
TCTAAAAGTAGTATTCCAACAATTTATATGAATGAGAATCTTCTTTTAAAATAAGATAAACTAGTTT  
TTGCCAGTTTTTTAAAATAACCTAAGGGATTGCTTTGTTTTATTTTAGTCCTGTTGTTCTACAATGT  
ACACATGTAACACCACAAAGAGAT[AA/del]GTCAGGTATGATTA AAAACAATGCTTTTTATTCTTA  
GAATACTAGAAATGTTAATAAAAAATAAACTTAACAATTTCCCTTTTTTTACCCCAGTGGTATGT  
GGGAGTTTGTTCATACACCAAAGTTTGTGAAGGTAAATATTCTACCTGTTTTATTTTTATGACTTAG  
TAATTGAGAATTTGACAATAGCGTTATACCTTTGCCCTGAGATTACAAATCTGTACCTAGCATTCTG  
CCTCATACAGGCAATTCAGTAAACGTTAAGTGAATAAAGAGTGAATGAAAAATAATATCCTTAATG  
ATCAGGGCATTCTATAAAAAATAAATATTTCTTTCCCTCCAGGGTCGTCAGACACCAAACATAT  
TTCTGAAAGTCTAGGAGCTGAGGTGGATCCTGATATGTCTTGGTCAAGTCTTTAGCTACACCACCCA  
CCCTTAGTTCTACTGTGCTCATAGGTAATAATAGCAAATGTGTATTTACAAGAAA

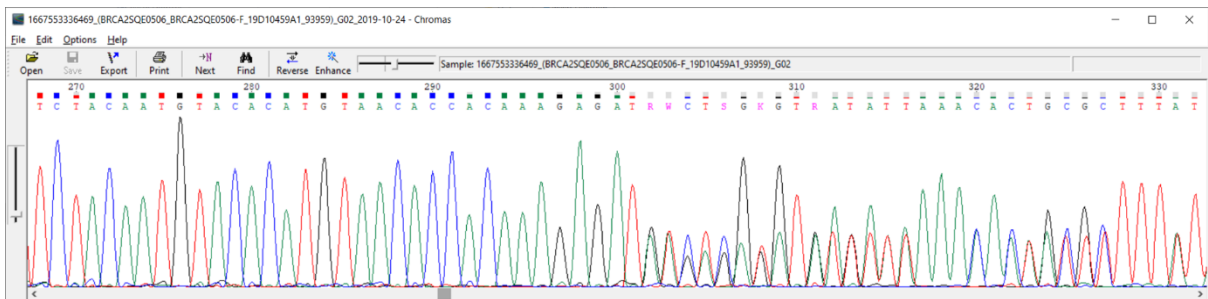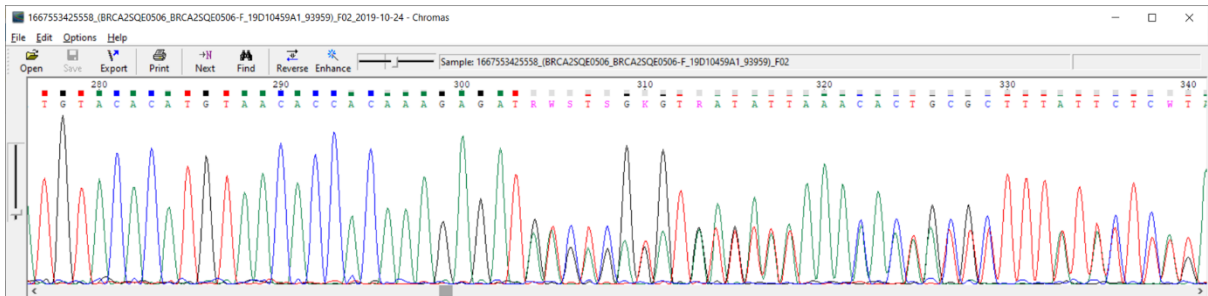

I1\_BRCA2\_chr13\_32930747\_G\_T\_splicing\_rs397507922

ATGTATAATTTTATAAAACAGGGCTTGCGCttttttttttttgagacagagtttctgctcttggtgccc  
aggctggagtgcaatggtgcaacctcggtcaccgcaacctcctcctcccgagttcaagtgattctcc  
tgcctcagcctgctgaatagctgggattacaggcatgtgccaccacacctggctacttttgtgttttt  
ttacttttatataatttttttttttggttagtagagacagggtttctccattttggtcaggctggtcct  
gaactcccgacctcagatgatctgcccgcctcagcctcccaaagtgctgggattacaggcgtgagcca  
ctgtgacctggccAGGGTTGTGCTTTTTTAAATTTCAATTTTATTTTGTCTAAGTATTTATTTCTTTGAT  
AGATTTAATT**ACAAGTCTTCAGAATGCCAG**AGATATACAGGATATGCGAATTAAGAAGAAACAAAGGC  
AACGCGTCTTTCCACAGCCAGGCAGTCTGTATCTTGCAAAAACATCCACTCTGCCTCGAATCTCTCTG  
AAAGCAGCAGTAGGAGGCCAAGTTCCCTCTGCGTGTT**TCATAAACAG [G/T] TATGTGTTTGTCTAC**  
AATACTGATGGCTTTTATGACAGAGTGTAATTTTATTTTCATTAACTAGTATCTACAAATGGCCTTTGTT  
TAAAGAATGAACACATTAGTGCAGGAATGGATGAATGAAATCATCATATTTTCTAATTAGCCTGCAGT  
GGCAGCCTCTGGCCCCTTGCTAGGCCTGCCTCATCCTGCTAAAGTGATCTGTGCTTCCAAATTACTAC  
TTCTT**TTCCCCCTTCAAATCTTCT**TATTTTGTGATTGTAATGCTCTCAGCTAGGTGTTAAAGTAGT  
CTTACTGATATTCAAATGTGAATAACTGATAGCCCTGAACCTTCTATGAGCTATTTATATTTTCCAAA  
GAGGATTCTCCTTAAGCCAATATTATCTAGGTAGAATTTTAGGCAATGGAGAGGTGAAAATAATATTG  
ATGACATtaatagctaactttgagcattttctaggtgtaagatgctcttctaagcacttcacatgcat  
taggtatatcttgcttaatcctcacagtcaccttgaagaaaggcactgttactttgtttccattttg

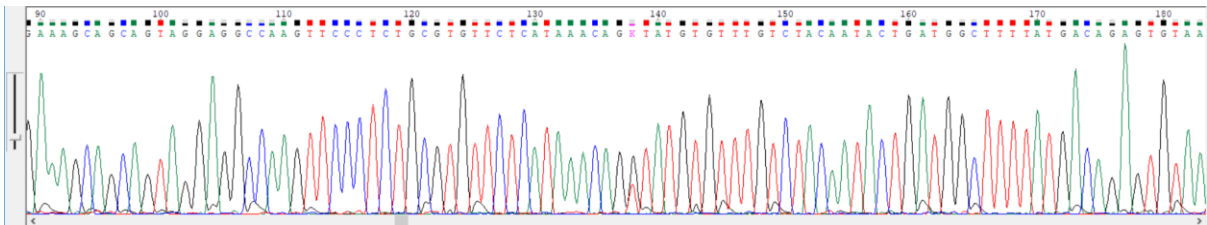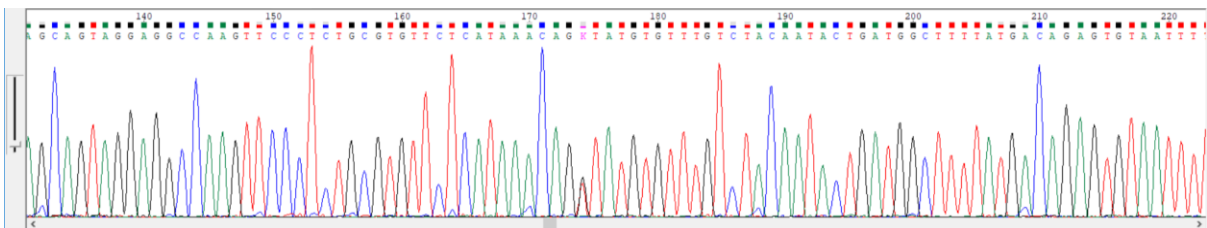

J1\_BRCA2\_chr13\_32936831\_G\_A\_splicing\_rs81002873

gcctaggctggtctcaaacttctggcctcaagcaatcctcctgcctcagcttcccaaatgctgggag  
tataggcatgagccaccatgctcagcAATGAAGTTTTTATCAGTATGATACTTTGATACATGTCAAAT  
AATTTTCTGAAATTATATTGTAGATCATATGAACTCATAAAAACCTTAA**TGATCTTGAACAATGTAGTT**  
**TTTGT**ACAGAGAATAGTTGTAGTTGTTGAATTCAGTATCATCCTATGTGGTTTTTTATGATAATATTCT  
ACTTTTATTTGTTCAAGGGCTCTGTGTGACACTCCAGGTGTGGATCCAAAGCTTATTTCTAGAATTTGG  
GTTTATAATCACTATAGATGGATCATATGGAACTGGCAGCTATGGAATGTGCCTTTTCTAAGGAATT  
TGCTAATAGATGCCTAAGCCAGAAAGGGTGCTTCTTCAAC**TAAAATACAG [G/A] CAAGTTTAA**GC  
ATTACATTACGTAATCATATACGGCAGTATGGTTAAGGTTTCTGTGTAGTCTGTGACTCCATGTCAA  
AATGTTGCACAAGCCAGTTGTC**AGTGACAGTTGCCATCCCA**ACTGCTGTTCTCCTGTCATCCCTAGC  
CCCCATTTAAGAGAGATCACACATTCATGCATTGCTTGCTTCCCTCTTTCCCCACCCCCCTCCTTAACC  
TCTTGATGTATGAGAAGAATATGAGTTACTAATTTGATCCACTATTTGGGGATTGCTAATAAAGCATT  
TTTGCATTTTATTTTTTGCTTTTTTAAAAATAATTGATATTTTAAACAATATGAAACAATATATTCCTAG  
CTACAAAATTTTTAATTCTCAGTATT

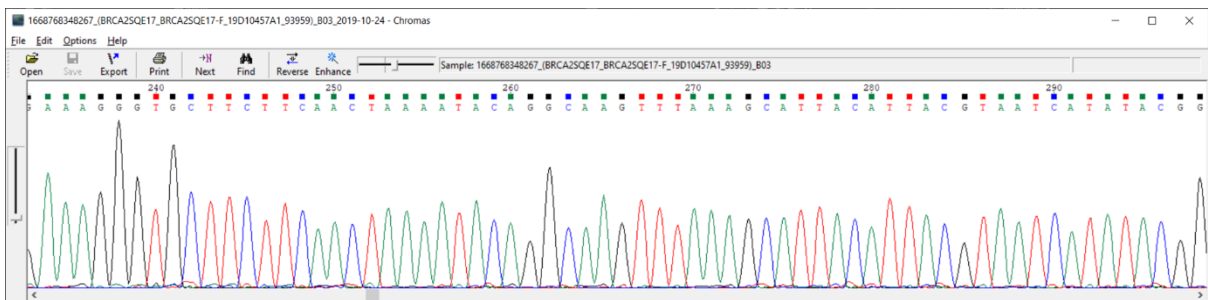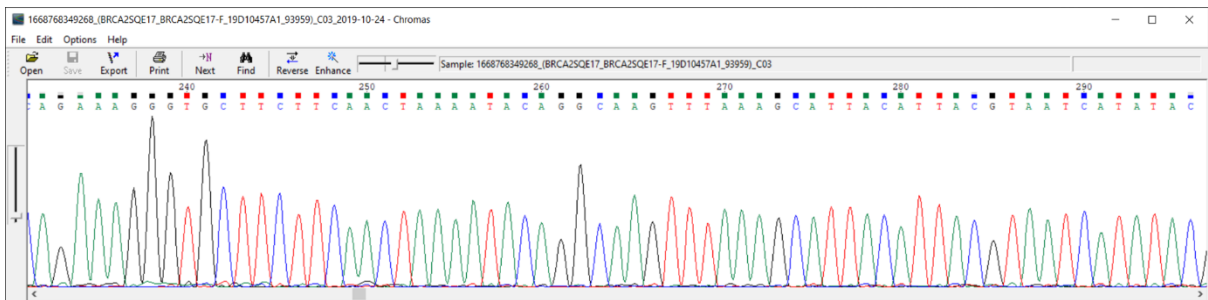



J2\_BRCA2\_chr13\_32936831\_G\_A\_splicing\_rs81002873

gcctaggctggtctcaaacttctggcctcaagcaatcctcctgcctcagcttcccaaatgctgggag  
tataggcatgagccaccatgctcagcAATGAAGTTTTTATCAGTATGATACTTTGATACATGTCAAAT  
AATTTTCTGAAATTATATTGTAGATCATATGAACTCATAAAAACCTTAA**TGATCTTGAACAATGTAGTT**  
**TTTGT**ACAGAGAATAGTTGTAGTTGTTGAATTCAGTATCATCCTATGTGGTTTTTTATGATAATATTCT  
ACTTTTATTTGTTCAAGGGCTCTGTGTGACACTCCAGGTGTGGATCCAAAGCTTATTTCTAGAATTTGG  
GTTTATAATCACTATAGATGGATCATATGGAACTGGCAGCTATGGAATGTGCCTTTCCTAAGGAATT  
TGCTAATAGATGCCTAAGCCAGAAAGGGTGCTTCTTCAAC**TAAAATACAG [G/A] CAAGTTTAA**GC  
ATTACATTACGTAATCATATACGGCAGTATGGTTAAGGTTTCTGTGTAGTCTGTGACTCCATGTCAA  
AATGTTGCACAAGCCAGTTGTC**AGTGACAGTTGCCATCCCA**ACTGCTGTTCTCCTGTCATCCCTAGC  
CCCCATTTAAGAGAGATCACACATTCATGCATTGCTTGCTTCCCTCTTTCCCCACCCCCTCCTTAACC  
TCTTGATGTATGAGAAGAATATGAGTTACTAATTTGATCCACTATTTGGGGATTGCTAATAAAGCATT  
TTTGCATTTTATTTTTTGCTTTTTTAAAAATAATTGATATTTTAAACAATATGAAACAATATATTCCTAG  
CTACAAAATTTTTAATTCTCAGTATT

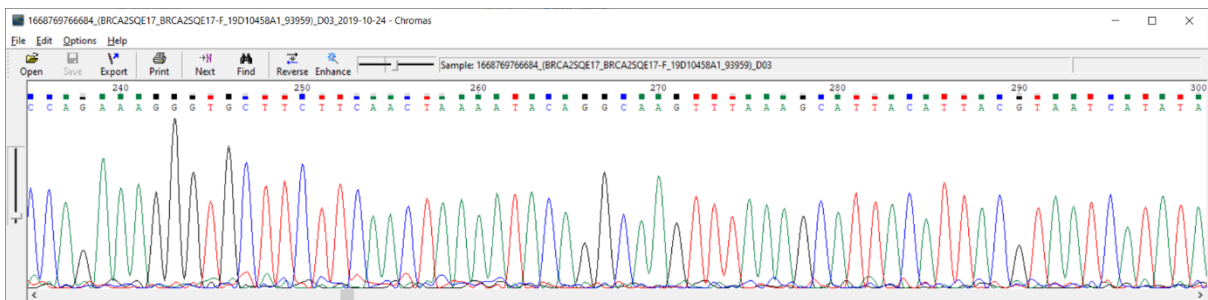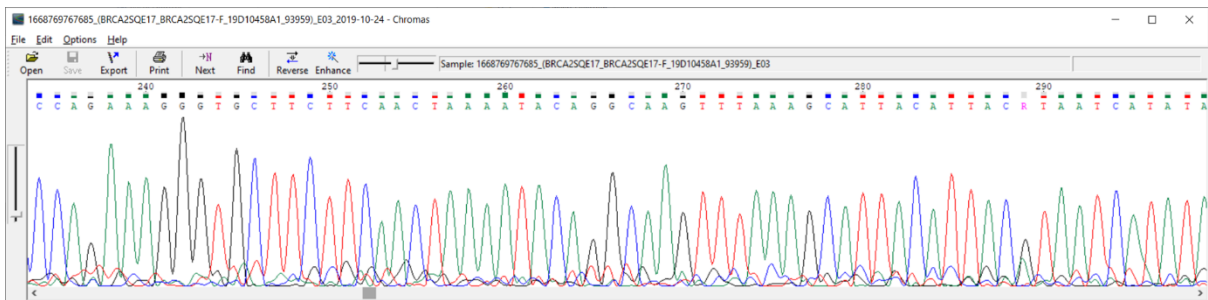

K1\_BRCA1\_chr17\_41209068\_C\_T\_splicing\_rs81002873

aggccaaggcgggaggatcacaaggtcaggggttcaagaccagcctgggcaagatgagttttcagtga  
gctgagatcgcaccactgcactctggcctgggcaatggagtgagactccgtcttgggaaaaaaaaa  
gagagaGAGAGAGCAAGAGAGAGAGAGagaaagacaccccagtgaagtgaaagagcaagtctttag  
attctcatctgcttaaagtcccagctcttccacttatcagctaagatctgaacc**cgagacgggaatcc**  
**aaatta**cacagcctctctaaatctcttagttttatcattcataaagtagagacaataactattttatgt  
ggttgggatggaagagtgaaaaagaacctgtgtgaaagtatctagcactgtgtatgtatgtaataag  
tcttacaaaatgAAGCGGCCCATCTCTGCAAAGGGGAGTGAATACAGAGTGGTGGGGTGAGATTTTT  
GTCAACTTGAGGGAG**GGAGCTTTAC [C/T] TTTCTGTCTT**GGGATTCTCTTGCTCGCTTTGGACCTTG  
GTGGTTTCTTCCATTGACCACATCTCCTCTGACTTCAAAATCATGCTGAAAGAAACCAACACAACCC  
ATCAGGATAAGAGAAAGAGAAGCTTCCCTTCAATGGAAGTGGAGCAGACACGTCATATTTAAGGCATTC  
Aggccaggcgcagtggtcaccctgtaatcctagcactttgggag**actgaggcaggcagatcact**tg  
aggtcaggagttcgacaccagtctgaccaacatggtgaaacctcatctctactaaaaatacaaaaaat  
tagttggcgtggtggcaggcactgtaatcccagctacttgggaggctgaggcaggagaaatcttttg  
aatgcaggaggtggaggttcagtgagctgagatggtgccactgcactccagcctgggtaacagagcg  
agactccatctcgcactctcaaaaaattaaaaataaaattaaaaaaaaaaaaaT

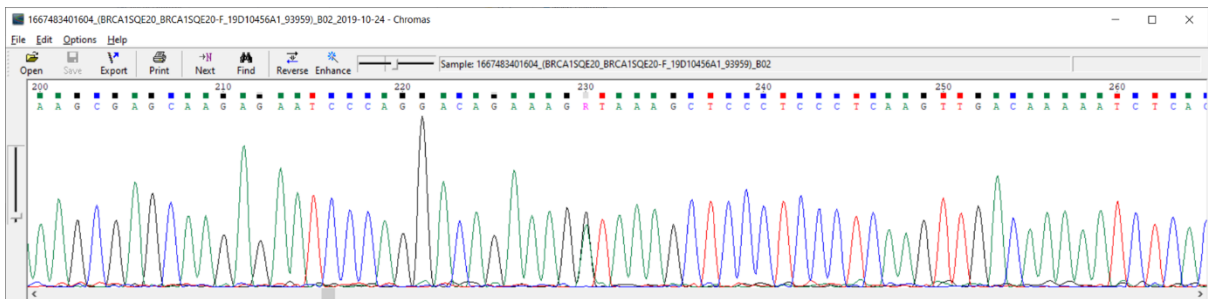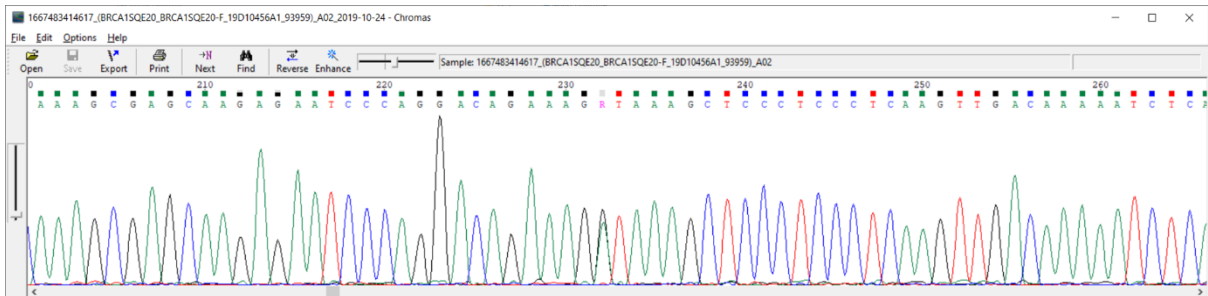

L1\_DSC2\_chr18\_28667778\_T\_C\_splicing\_rs397514042

GACagcataacatttattaactcctatTTgtcaggcactgtgcttggcattcgcgtgtgtattgagctt  
cacttcatcttcataacaatctggcatactgataaccattttacagatgaagaaattaggcttgcca  
agattaggaaatttgccaagcatcacacagctagtgaacacagagtaaaat **tcacaccagagtcctt**  
**ta**ttcttgcgtgctgggatacgcgtgcttctcAACGGACATAGTGAACTAAATGTATGAATTGAAACAC  
AGTTAATTTGCCATATATTGTTTAAGGAGGTACTCACCCACTCTGCAATTTTCAAAAATTGTAAAAGT  
ATAAGTTTCTTCTGTAAAAATTGGGTAGTTATCATTTCATCCTCTATTTTGATTATTAGGGGCAGTG  
GAAGTTCTGGAGTATACCCATCTGGAGTTGTTGCAAAG**GGCAATTATC [T/C] GTGAAGAGAG**TAAAAAT  
AAGGAGAAAAGTGAAAATAATCTTTTAAAATGAGGTATGCTTCAAATTCATTTTGGCTTTAACTTGGA  
GACTGTTCAGAACTACAGTATGAGTCTCACCATTTGTTATTGTTCTGGGATATGGATATAATTTTAAAT  
GCCAAAGAGGTGCCTAATTTTCATGATTCAATATGGCATTGTATGTTTAAATTTATCTCTTTAAATTTA  
TGAAAGATAATTTTAGTTTCTTCATTATTGCTATACTGTTATTTCATGAGTGTAACAATTTTACTGTT  
ATTTTCCCAAACAGCCTTGAAGACTTCTTTATTTTGCTTTGTTTGAAGGTTTCAGGTGCATGGATTTT

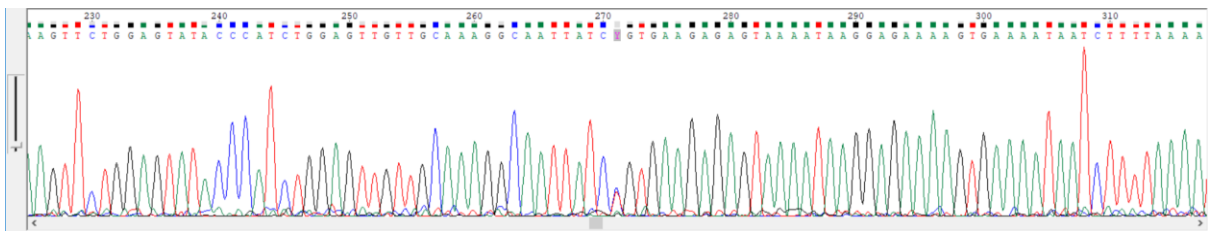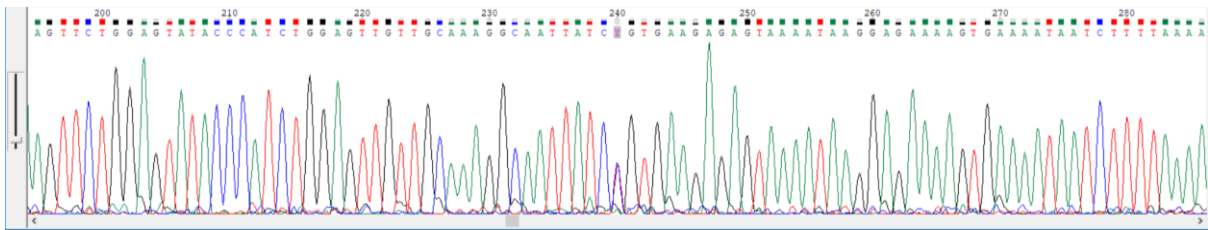

M1\_DSG2\_chr18\_29116261\_G\_A\_exonic\_rs121913009

accatcttcaaaaaaaaaaTTGAGGGGTAGATAAAAATTTAAAAATAGATGTCTAAAAAAATTTT**TTAGT**  
**AAGATGAAATAAGCACCT**AATTTCTCCAGTAGATAAATCTCACATTTCTACTTGGTAAGTGGATTAAA  
AGATATTACTTGGTCCAAATTTGAAACATATCTAGGATAGAAAATGTCCCTAAGTGGTTAGTACCTTCT  
CCACTCCAATTTGGCAAGGGAATTCAAACATATGTCTGTTGTCAGCAATAGGAACAGAATGTACATACT  
TTTTCTCTCTTATTTTTAAGATTATCCTAGAAAAACCATCAGTGGCACAGTCCTTATCAATGTTGAAG  
ACATCAACGACAACCTGTCCCACACTGATAGAGCCTGTG**CAGACAATCT [G/A] TCACGATGCA**GAGTA  
TGTGAATGTTACTGCAGAGGACCTGGATGGACACCCAAACAGTGGCCCTTTCAGTTTCTCCGTCATTG  
ACAAACCACCTGGCATGGCAGAAAAATGGAAAATAGCACGCCAAGAAAGTAAGCAAAATCACTGGACT  
ACATAGAAATCTAAATATTAAGCATGATATCTAAAATATTTGTAAGTTGTATTTCTTCTCATAAATTA  
TATTTCCAATATAGTTTTTTTAAAGGAGTTTATGAAATGAGGTCCTGAACCTACTGACATATAGTATCT  
TTTATATGCTTATGGAGAGAAGAAA**AATAATCTAAAATGTCTTGAAGGTAG**CTGGGTATTCCCTAAAT  
AGCCCTTGAAGTAGTTTTGTCTGGTAAGGTGAGGAGTACCAAGCCTTTGTCAGCACCACAATCGTAGT  
AGTTTGCCTTCTAAAAATCTTGTAGTAACAGTAATTCATTTAaacaacatttattgagcacttgct

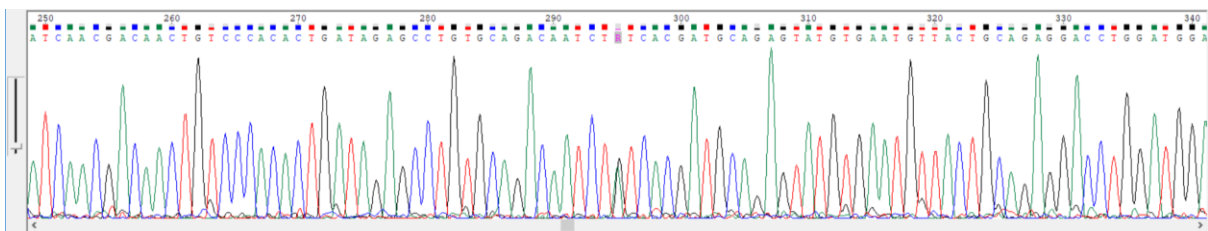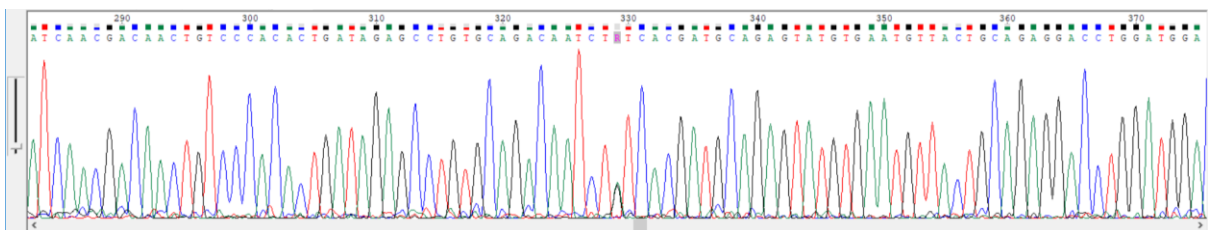

N1\_LDLR\_chr19\_11210962\_G\_A\_exonic\_rs267607213

tggagtgcaatggcacaatcttggctcaccacaaagtctgcctcccaggttcaagtgattctcctgcc  
tcagcctcctgagtagctgggattacagggcatgtgccaccacgcccagctaattttgtatTTTTtagta  
gagacggggtttcaccatggtggcaggctggtttcgaactgctgacctcaggtgatctgccacctc  
ggcctcccaaagtgctgggattacagggcatgagccaccatgcccagcTGTAGTACAGGTTTTAATATG  
CTAAATACTCTTCCTTTCTTTattaatgtgcatggaagttctaataTTTTTTTccataccccagaga  
gtcCATATTTTTGGAATCAACAACACTAGCCTTTGTTGACAAGTGTCTCTCTTGGGTTCCCTCTTTGTG  
TCCTCCACTGAATTTTTGGGGTTCATAAAATTCATTTGTTGTGCTTGCTTAATTCCTGGAATCAGA  
CTGTTCTGATCGGATGACATTTCTGGTTAATTCCTTAGTTGGCAGGAAATAGACACAGGAAACGTGG  
TCAGTTTCTGATTCTGGCGTTGAGAGACCCTTTCTCCTTTTCTCTCTCTCAGTGGGCGACAGATGCG  
AAAGAAACGAGTTCAGTGCCAAGACGGGAAATGCATCTCCTACAAGT[G/A]GGTCTGCGATGGCAG  
CGCTGAGTGCCAGGATGGCTCTGATGAGTCCAGGAGACGTGCTGTGAGTCCCCTTTGGGCATGATAT  
GCAtttatTTTTgtaatagagacaggtctcgccatggtggcaggctggtcttgaatttctggtctc  
aagtgatccgctggcctcggcctcccaaagtgctgggattacagggaccacgcctggccTGTGACACG  
ATTCTTAACCCCTTTTTGATGATGGCGGCTGGAAAAGTGGCCAGTGGATTTTGTATGATTCAATCATG  
AATTAGGAGGTGGGGAGAGAATGAATTATTGGAGCTTTCCTTAAAGCCATTAAATGGCTCTATTGttt  
tttcaattgatgtgaatttcacataacatgaaattaaccagctcagtgccattaatacatctgcaatg  
ctgtgtggccaccacctctatcttgttccaaaactttgcataaccTAATGtctTTTTTTTTTTTTTTT

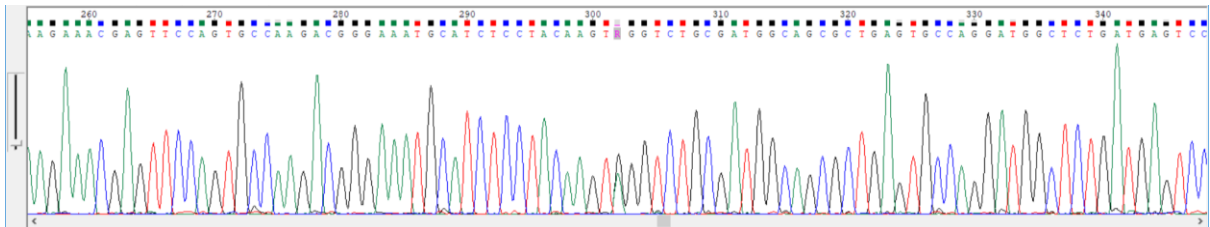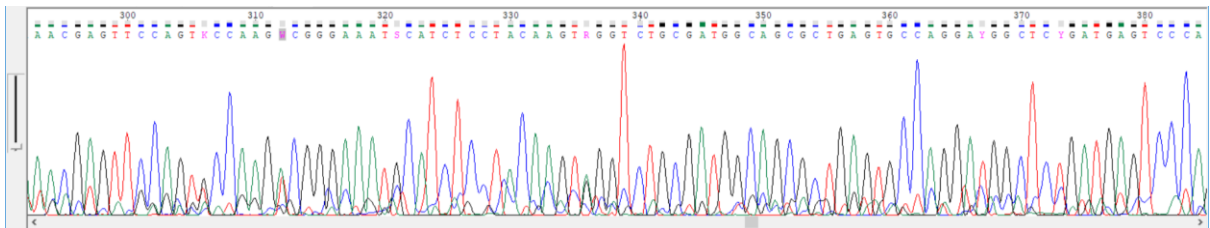

O1\_RYR1\_chr19\_38948185\_C\_T\_exonic\_rs118192172

ggagaatgatgtgaacccgggaggcagagcttgcagtgagctgagattgcgccaactgcactccagcct  
gggcgacagagccagactccatctccaaaaaaaaaaaaaaaaaaaaaaaaaaggaataacaaaaaccag  
aattacttttgctccagcctaatacattttccacttggcccctaagacacaagtttgcaaccctgC  
TGATTTAAAATTTTCATCTTGATTCCCTGTGTCTCTCACTGGTCGTTTCAGTCTGCCTTCTGACCTCTTA  
CCTCACTACTCCAGTATCTCCT**TCCTTACATTGCTGATACCTTA**TCCCAACTCATGTGACCCTCCCTC  
AGCCTCTTGCCAGATCTTCCCTCTTTGACCCCTAACCTTTCTCTGATCCCTGACCTTCCACTTTACCA  
CCTCCTCTCAGTCAAATTTGCCACATCTTATCCCGATGCGCTGTCTTTCCCTCCTGGCTTCCCTCCCT  
CCCAGGGTTCTTCTGTAGATCCTGCCCTGGTGCCTACACACCCTTTAACCTCTGACCTTACCTCTAG  
GTCTTGACGTGCTATGCTCCCTGTGTGTGTGTAATGG**TGTGGCTGTA [C/T] GCTCCAACCA**AGATC  
TTATTACTGAGAACTTGCTGCCTGGCCGTGAGCTTCTGCTGCAGACAAACCTCATCAACTATGTCACC  
AGGTCTGGCTCTCAACATCTGACCCCAAGAACTCAGAACCTCTCAACCCTCTCCCTGACTTAGAGACTC  
CACACCAGATGGATGTCCTTTCCTTAATCTCCACCCCAAGGTTAACAACCAGTCCCTCACAGATGTC  
CACTGTGGCCCCACTCTCCCTTGGCATCCACTCCTCTTGTCTGTCTTCCCTGGCTCCATTTCTGCctc  
tatctgtttctctttctttctccctctccctctctctctgttttc**cttttttatctttgectgtttt**t  
gtcttgattcttccatgtctttctccctgtctctctcccctctctctctctctctctTTGGATGT  
CTGTCTCTCTGGCTTCCCACCACTTGGCTCTCCTCTCTGCCTCTCCGTCATCCCCCTCTCCTGTCC  
CATCTCTCCTGCAGCATCCGCCCAACATCTTTGTGGGCCGAGCGGAAGGCACCACGCAGTACAGCAA

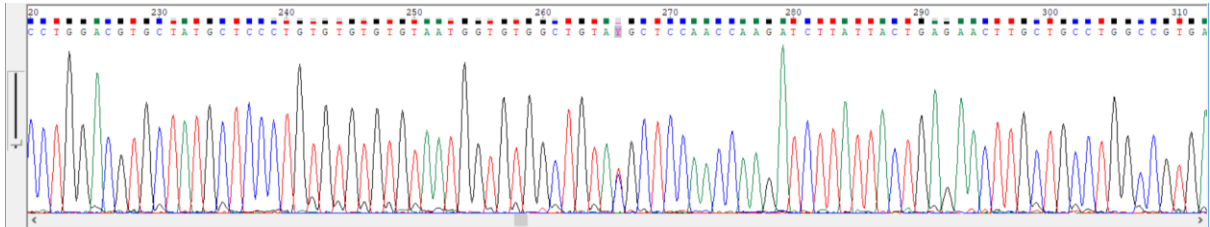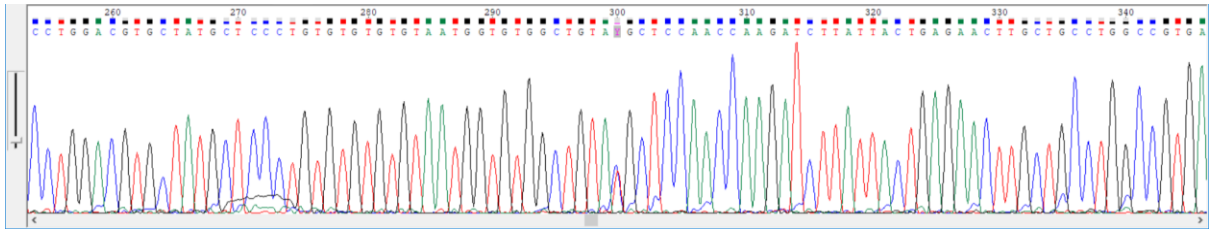

O2\_RYR1\_chr19\_38948185\_C\_T\_exonic\_rs118192172

ggagaatgatgtgaacccgggaggcagagcttgacgtgagctgagattgagccactgcactccagcct  
gggcgacagagccagactccatctccaaaaaaaaaaaaaaaaaaaaaaaaaaggaataacaaaaaccag  
aattacttttgctccagcctaatacattttccacttgggcccctaaagacacaagtttgcaaccctgC  
TGATTTAAAATTTTCATCTTGATTCCCTGTGTCTCTCACTGGTCGTTTCAGTCTGCCTTCTGACCTCTTA  
CCTCACTACTCCAGTATCTCCT**TCCTTACATTGCTGATACCTTA**TCCCAACTCATGTGACCCTCCCTC  
AGCCTCTTGCCAGATCTTCCCTCTTTGACCCCTAACCTTTCTCTGATCCCTGACCTTCCACTTTACCA  
CCTCCTCTCAGTCAAATTGCCACATCTTATCCCGATGCGCTGTCCTTTCCTCCTGGCTTCCCTCCCT  
CCCAGGGTTCTTCTGTAGATCCTGCCCTGGTGCCTACACACCCTTTAACCTCTGACCTTACCTCTAG  
GTCCTGGACGTGCTATGCTCCCTGTGTGTGTGTAATGG**TGTGGCTGTA [C/T] GCTCCAACCA**AGATC  
TTATTACTGAGAACTTGCTGCCTGGCCGTGAGCTTCTGCTGCAGACAAACCTCATCAACTATGTCACC  
AGGTCTGGCTCTCAACATCTGACCCCAAGAACTCAGAACCTCTCAACCCTCTCCCTGACTTAGAGACTC  
CACACCAGATGGATGTCCTTTCCTTAATCTCCACCCCAAGGTTAACAACCAGTCCCTCACAGATGTC  
CACTGTGGCCCCACTCTCCCTTGGCATCCACTCCTCTTGTCTGTCTTCCCTGGCTCCATTTCTGCctc  
tatctgtttctctttctttctccctctccctctctctctgttttc**cttttttatctttgectgtttt**t  
gtcttgattcttccatgtctttctccctgtctctctcccctctctctctctctctctTTGGATGT  
CTGTCTCTCTGGCTTCCCACCACTTGGCTCTCCTCTCTGCCTCTCCGTCATCCCCCTCTCCTGTCC  
CATCTCTCCTGCAGCATCCGCCCAACATCTTGTGGGCCGAGCGGAAGGCACCACGCAGTACAGCAA

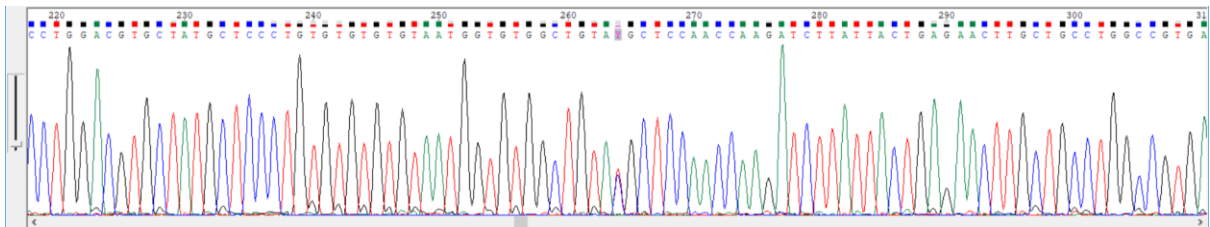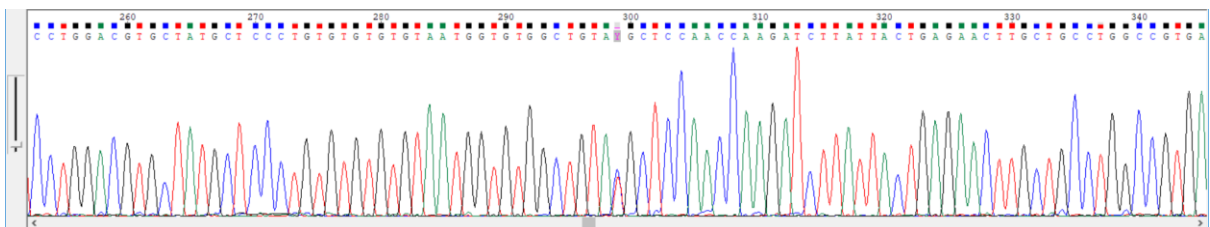

O3\_RYR1\_chr19\_38948185\_C\_T\_exonic\_rs118192172

ggagaatgatgtgaacccgggaggcagagcttgacgtgagctgagattgagccactgcactccagcct  
gggcgacagagccagactccatctccaaaaaaaaaaaaaaaaaaaaaaaaaaggaataacaaaaaccag  
aattacttttgctccagcctaatacattttccacttgcccctaagacacaagtttgcaaccctgC  
TGATTTAAAATTTTCATCTTGATTCCCTGTGTCTCTCACTGGTCGTTTCAGTCTGCCTTCTGACCTCTTA  
CCTCACTACTCCAGTATCTCCT**TCCTTACATTGCTGATACCTTA**TCCCAACTCATGTGACCCTCCCTC  
AGCCTCTTGCCAGATCTTCCCTCTTTGACCCCTAACCTTTCTCTGATCCCTGACCTTCCACTTTTACCA  
CCTCCTCTCAGTCAAATTTGCCACATCTTATCCCGATGCGCTGTCTTCTCCTGGCTTCCCTCCCT  
CCCAGGGTTCTTCTGTAGATCCTGCCCTGGTGCCTACACACCCTTTAACCTCTGACCTTACCTCTAG  
GTCTGGACGTGCTATGCTCCCTGTGTGTGTGTAATGG**TGTGGCTGTA [C/T] GCTCCAACCA**AGATC  
TTATTACTGAGAACTTGTGCTGGCCGTGAGCTTCTGCTGCAGACAAACCTCATCAACTATGTCACC  
AGGTCTGGCTCTCAACATCTGACCCCAAGAACTCAGAACCTCTCAACCCTCTCCCTGACTTAGAGACTC  
CACACCAGATGGATGTCCTTTCCTAATCTCCACCCAGGGTTAACAAACAGTCCCTCACAGATGTC  
CACTGTGGCCCCACTCTCCCTTGGCATCCACTCCTCTTGTCTGTCTTCCCTGGCTCCATTTCTGCctc  
tatctgtttctctttctttctccctctccctctctctctgttttc**cttttttatctttgctgtttt**t  
gtcttgattcttccatgtctttctccctgtctctctcccctctctctctctctctctTTGGATGT  
CTGTCTCTCTGGCTTCCCACCACTTGGCTCTCCTCTCTGCCTCTCCGTCATCCCCCTCTCCTGTCC  
CATCTCTCCTGCAGCATCCGCCCAACATCTTTGTGGGCCGAGCGGAAGGCACCACGCAGTACAGCAA

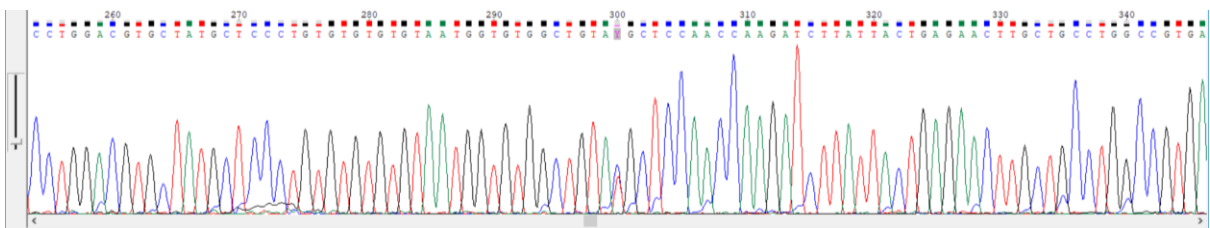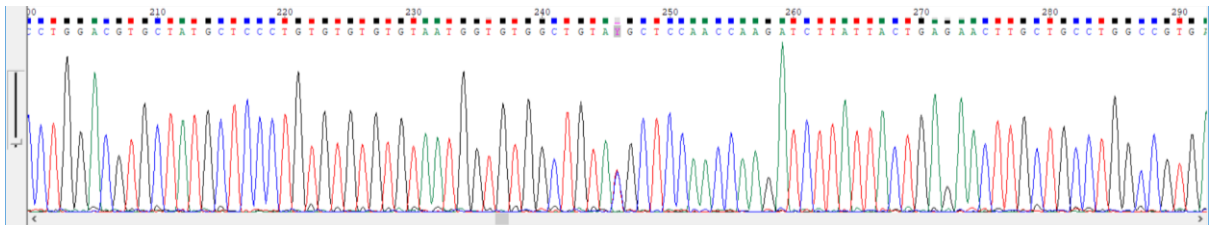



P1\_RYR1\_chr19\_38986923\_C\_T\_exonic\_rs118192177

gggattacacgcatgagccaccgcaccccgccagctgtaggaattgagtgagttcagatctgtaaagg  
cgggtggtgctaaggcacagagtgagaggggtcaagaatgccaacgctgtcaCAGTGGTGGCTATGGCCCT  
CTCCGGACCTGGGGCCCCTGGTGACCCCGCACACTCTGCCCGTGCACAGGAACATCATGAACAACAAAG  
TCTTCTACCAACACCCGAACCTGATGAGGGCGCTGGGCATGCACGAGA[C/T]GGTCATGGAGGTCAT  
GGTCAACGTCTCGGGGGCGGCAGTCCAAGGTGAGGGCCCAGGCAGGTGCTGGGGAGCTCAGGGGAG  
GCAGCCACAGAGGGCAGGCCCTGACCACCCTGCCTGTCCCAGGAGATCCGCTTCCCCAAGATGGTGAC  
AAGCTGTGCCGTTTCTTCTGCTATTTCTGCCGAATCAGCCGGCAGAACCAGCGCTCCATGTTTGACC  
ACCTGAGCTACCTGCTGGAGAACAGTGGCATCGGCCCTGGGTGAGAACCCCGAGCCCAGGGGCTGTCC  
CCCAGAACCCTCCTGGCACCCCGTCCAGGCCTGCCCCACTTTCCACCAGctcactca tcaacaaa  
cactccctctdaactgtggttctggccctgtaatgagtaatgctggggacacaatagtgacccaata

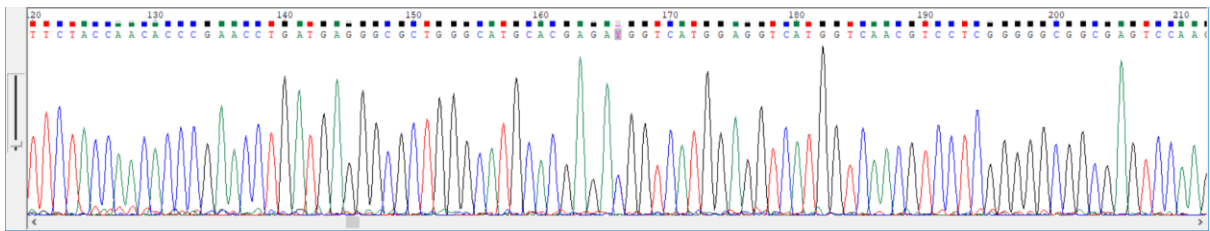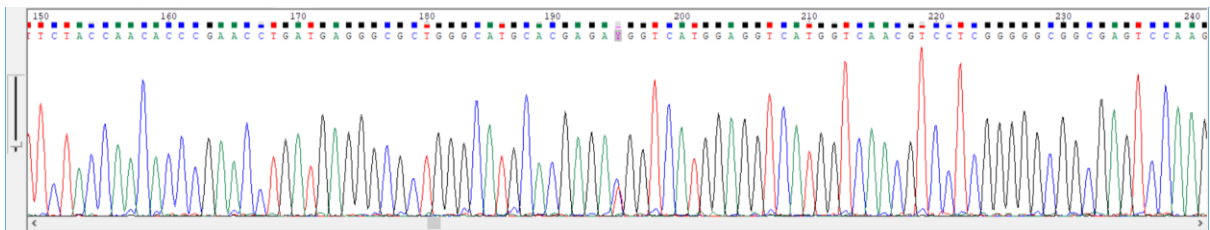

Q1\_RYR1\_chr19\_39071043\_G\_A\_exonic\_rs118192168

CTCGAGTGGCCCCTACCCTCCAGAGTGTCTCCTCGTGTGTCCCTGCCTTCCCCCTGACCCCTGGCCCTG  
TGTGCCACAGTCTTCCCTGTACCTGGGCTGGTATATGGTGTATGTCCCTCTTGGGACACTACAACAAC  
TTCTTCTTTGCTGCCATCTCCTGGACATCGCCATGGGGGTCAAGACGCTGCGCACCATCCTGTCTC  
TGTACCCACAATGGGAAACAGGTGTGGGGAGGACCTGGCTGTGGGGCGTGGGCCAGCAGGGACCAGC  
GTGGCAGTGGGTGGTGAAGGGATAAGGGCCGGGACAGCTGGGCTGAGGAGGGGCAAGGCCAGGTGCGCT  
GAGCCGGGGGTGTGTGGGGCAGCAAGGTA**GAGCCACAGGGACTGAACCG**GGCCAGGACCCAGCATGG  
GCAGGGTGGGGGGAGGGCAAGCCCAGGGCGGAGCTGACCTGGCCCCATCCTGCCCCAGCTGGTGATG  
ACCGTGGGCCTTCT**GGCGGTGGTC [G/A] TCTACCTGTA**CACCGTGGTGGCCTTCAACTTCTTCCGCA  
**AGTTCTACAACAAGAGCGAGGATGAGGATGAACCTGACATGAAGTGTGATGACATGA****TGACGGTGAGC**  
**CCCTCCCCTAG**Cactctgggacccttccttctcgcacatctgttgaaggagtaataatggtacctccag  
gccgggctggtgctccagcctgcaatcccagtgcgtcgggagggcagggcgggacgattacttgag  
tccaggagtggaaaccagcctgggcaacaaagcaaaaatcctgtctctataaaaaaaaaatttaaacy  
ttagctgggtggtgtgtgtgtgctggaggctaaggcaagaggatcacttgggtcccagcagtttgag  
gcttagtgagctacgaatgggccaactacactccatcctggcagacagacagagaccctatctctaaa  
aatgaaaatagtacctacagtttggcaagctgatgcatgccaggcacat

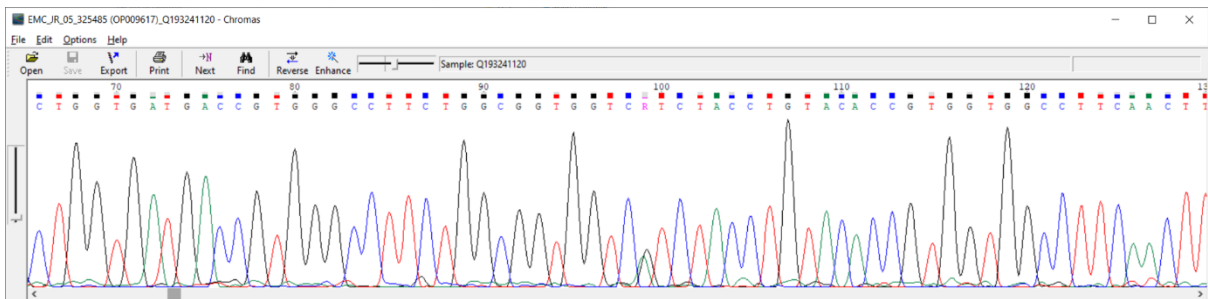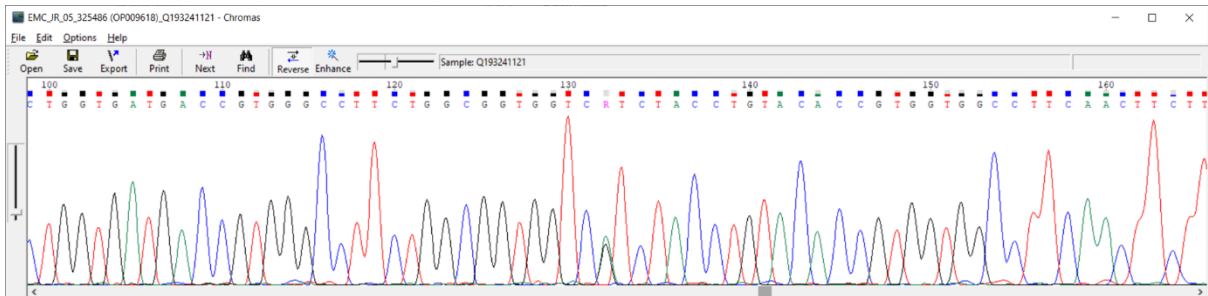

### Supplement 3; Event Z-scores of three KP variant carriers

| Carrier | ICD10 | Description           | Age at Event | Total Number of Events | Average Event Age (SD) | Z-score |
|---------|-------|-----------------------|--------------|------------------------|------------------------|---------|
| D1      | I48   | Atrial Fibrillation   | 64           | 547                    | 77 (10)                | -1.3    |
| D1      | I46   | Cardiac arrest        | 81           | 121                    | 81 (8)                 | 0.0     |
| F4      | I21   | Myocardial Infarction | 72           | 354                    | 79 (8)                 | -0.9    |
| F4      | I21   | Myocardial Infarction | 72           | 354                    | 79 (8)                 | -0.9    |
| F4      | I21   | Myocardial Infarction | 73           | 354                    | 79 (8)                 | -0.8    |
| F4      | I21   | Myocardial Infarction | 77           | 354                    | 79 (8)                 | -0.3    |
| F4      | R99   | Death, cause unknown  | 85           | 165                    | 87 (7)                 | -0.3    |
| F7      | I20   | Angina Pectoris       | 69           | 141                    | 72 (8)                 | -0.4    |
| F7      | I50   | Heart Failure         | 69           | 760                    | 80 (8)                 | -1.4    |

## Supplement 4; Methods of phenotype collection

### **Supplementary methods; collection of ICD10 based phenotypic events**

Follow-up started after the baseline home interview of each individual participant. Data on clinical outcomes of interest are collected continuously through an automated follow-up system. The follow-up system involves automated digital linkage of the study database to digital files from general practitioners (GPs) in the study area. On a weekly basis, all ICPC codes of relevant diagnoses made by the GPs and medical specialists in study participants are entered to the Rotterdam Study database.

Moreover, the entire medical record of each participant living in the research area is checked manually on a regular basis at the GPs' office by trained research assistants for diagnoses of interest. This is the primary source of information on incident events, since all letters of medical specialists, discharge reports in case of hospitalization, and additional information are copied by the research assistants. Additional information is obtained from the hospitals in case the automated follow-up system or medical records contain insufficient information.

Medical records of the participants under the care of nursing home physicians or GPs working outside the study area are checked annually for potential events (this holds for approximately 15% of all participants).

Subsequently, all the collected information is compared to the ICPC codes already entered to the study database for each individual participant. This is done in order to make sure no clinical information on potential events is missed out. Furthermore, before every repeat examination at the research center the participants are interviewed on the occurrence of new events since their last visit.

With respect to the vital status of all participants, information is obtained on a weekly basis from the central registry of the municipality in Rotterdam and through the digital linkage with GPs working in the study area. For participants living outside the research area, the GPs are the primary source of information, complemented by the municipality records in the place of residence. After notification, cause and circumstances of death are established by requesting information from the medical records of the GPs or nursing home physicians.
